# Supplementary material for: The role of P2Y12 in the kinetics of microglial self-renewal and maturation in the adult visual cortex in vivo
Source: eLife. 2021 Jul 12;10:e61173. doi: 10.7554/eLife.61173 (PMC8341987; doi:10.7554/eLife.61173)
Supplement: Figure 1—source data 1. [file elife-61173-fig1-data1.xlsx]

## Sheet: Figure 1-Source data 1
Figure 1-Source Data 1: Source data for microglia turnover and migration in the physiological brain
Figure 1: In vivo imaging of microglia shows limited migration and turnover in the physiological brain. (A) A field of microglia in an awake mouse imaged over 14 consecutive days. The dark diagonal lines in the center and top right of the image are blood vessels that remain structurally stable and can be used as landmarks to identify the same location for chronic imaging. Several microglia are id…
Figure 1B	3D Nearest Neighbor (NN) Normalized to D1
		Animal 1	Animal 3	Animal 4
	D1	1	1	1
	D2	1.01103	0.995921	0.986021
	D3	1.0089	0.955427	0.983061
	D4	0.94668	0.951403	0.995052
	D5	0.963964	1.00419	1.00287
	D6	0.959214	0.969675	1.09642
	D7	0.995503	1.00568	0.973
	D8	0.962325	1.03089	0.975971
	D9	0.984269	1.00116	1.0607
	D10	1.03819	1.06513	1.10503
	D11	1.04203	0.966337	0.978866
	D12	1.12643	0.967547	1.01682
	D13	1.06991	0.986927	1.0545
	D14	0.937169	1.04705	0.993391
Figure 1C	Translocation Index consecutive days
		Animal 1	Animal 3	Animal 4
	D1-D2	11.3315	15.1797	12.9407
	D2-D3	8.92352	7.62462	13.3001
	D3-D4	10.9447	13.2632	14.3951
	D4-D5	14.667	17.5551	14.5547
	D5-D6	14.0638	16.0372	12.9335
	D6-D7	12.8122	16.5053	20.7641
	D7-D8	20.3395	23.0018	18.6728
	D8-D9	18.3251	23.6892	17.748
	D9-D10	17.691	15.0001	18.9824
	D10-D11	13.7465	17.4582	13.9632
	D11-D12	16.7226	27.5055	11.042
	D12-D13	23.3031	17.9328	23.6997
	D13-D14	22.4443	13.7969	31.0397
Figure 1D	Translocation Index consecutive days
		Animal 1	Animal 3	Animal 4
	D1-D2	12.9407	11.3315	15.1797
	D1-D3	18.079	8.73337	14.1666
	D1-D4	12.2465	14.6263	15.4394
	D1-D5	8.8555	14.4457	12.8559
	D1-D6	15.6376	11.6071	18.3688
	D1-D7	18.8583	15.3042	16.0414
	D1-D8	17.6425	15.5769	18.1323
	D1-D9	22.806	20.4637	20.2727
	D1-D10	12.5938	15.5009	12.332
	D1-D11	17.849	13.8611	18.7058
	D1-D12	11.7362	17.7452	20.5832
	D1-D13	21.114	15.9385	13.8598
	D1-D14	21.7602	18.086	20.0403
Figure 1E	Number of Microglia
		<10μm				10-20μm				20-30μm				>30μm
	D1-D2	8	7	5		7	6	7		1	0	2		0	3	0
	D1-D4	9	11	6		5	1	7		0	0	0		2	4	1
	D1-D7	11	3	3		1	6	6		1	5	0		3	1	3
	D1-D10	11	10	6		1	4	6		1	2	1		3	1	1
	D1-D12	4	0	7		7	9	6		2	5	1		3	2	0
	D1-D14	5	5	2		6	7	7		1	0	2		4	4	3
