# Supplementary material for: The role of P2Y12 in the kinetics of microglial self-renewal and maturation in the adult visual cortex in vivo
Source: eLife. 2021 Jul 12;10:e61173. doi: 10.7554/eLife.61173 (PMC8341987; doi:10.7554/eLife.61173)
Supplement: Figure 1—source data 2. [file elife-61173-fig1-data2.xlsx]

## Sheet: Sheet1
Figure 1-Source Data 2: Source data for CSF1R inhibition in the adult brain.
Figure 1-figure supplementary 1: CSF1R inhibitor consistently eliminates microglia from the adult brain. (A-C) Representative maximum intensity projections of confocal images of microglia from the primary visual cortex (V1) in fixed sections of control (A), 7 days PLX (B), and 7 days repopulated (C) mice. (D) Microglial numbers significantly decreased with PLX. n=3-4 animals, average of 3-4 slice…
Figure 1- Supplementary 1D	Control	PLX
	153.079	66.2933
	156.176	68.4107
	122.306	57.8811
		22.5439
