# Supplementary material for: The role of P2Y12 in the kinetics of microglial self-renewal and maturation in the adult visual cortex in vivo
Source: eLife. 2021 Jul 12;10:e61173. doi: 10.7554/eLife.61173 (PMC8341987; doi:10.7554/eLife.61173)
Supplement: Figure 1—source data 3. [file elife-61173-fig1-data3.xlsx]

## Sheet: Sheet1
Figure 1-Source Data 3: Source data for the Cytokine panel conducted
Figure 1-figure supplementary 2: No Change in inflammatory milieu following microglial depletion. (A-L) A combination of anti-inflammatory and pro-inflammatory cytokines including IL-1b, IL-4, IL-6, IL-10 and TFNa, were tested using a Multiplex Assay. Each experiment was assayed in triplicate. n=7 animals. T-test, ns. Graphs show means ± s.e.m. Points represent individual animals.
Figure 1-figure supplementary 2A	IL-1B	Control	PLX
		1.41248	0
		0	0.922308
		2.883	0.824273
		0	1.65757
		3.61825	0.432136
		0	0
		0	0
Figure 1-figure supplementary 2B	IL-4	Control	PLX
		0	0.205665
		0.132667	0
		0.424659	0.059669
		0	0.716651
		0.205665	0.132667
		0.570655	0.278663
		0.322461	0.570655
Figure 1-figure supplementary 2C	IL-6	Control	PLX
		2.23	1.12
		2.23	2.96
		1.49	2.96
		2.23	3.33
		1.68	1.31
		1.86	1.12
		2.05	1.12
Figure 1-figure supplementary 2D	IL-10	Control	PLX
		3.57049	0
		0.806192	0.990479
		5.7205	4.49192
		4.49192	1.29762
		0	0
		0	9.71337
		2.64906	4.36906
Figure 1-figure supplementary 2E	TNFa	Control	PLX
		0.871108	0.046842
		0.235246	1.34212
		1.22436	0.988861
		0.47075	0.517851
		0.282347	0
		0.517851	0.517851
		0.046842	0.94176
