# Supplementary material for: The role of P2Y12 in the kinetics of microglial self-renewal and maturation in the adult visual cortex in vivo
Source: eLife. 2021 Jul 12;10:e61173. doi: 10.7554/eLife.61173 (PMC8341987; doi:10.7554/eLife.61173)
Supplement: Figure 2—source data 1. [file elife-61173-fig2-data1.xlsx]

## Sheet: Figure 2
Figure 2-Source Data 1: Source data of microglial repopulation after partial depletion
Figure 2: Microglia rapidly repopulate the visual cortex after partial depletion. (A) A field of microglia during depletion and repopulation imaged in vivo in the same awake mouse. (B) The number of microglia (normalized to control day for each animal) during depletion (PLX) and with repopulation (day 1-day 30). Each line represents an individual animal (n=10, 70-80 microglia per mouse). (C) 3D n…
Figure 2B		Animal 1	Animal 2	Animal 3	Animal 4	Animal 5	Animal 6	Animal 7	Animal 8	Animal 9	Animal 10
	Control	1	1	1	1	1	1	1	1	1	1
	D7 PLX	0.333333	0.452381	0.25	0.25	0.34375	0.574074	0.106383		0.197183	0.295455
	D1	0.266667	0.357143	0.214286		0.21875	0.574074	0.446809		0.28169	0.409091
	D2	0.833333	0.904762	0.642857		0.453125	0.925926	0.638298	0.314286	0.352113	0.386364
	D3	1.11667	1.09524	1.03571		1.01562	1.18519	0.829787	0.514286	0.84507	0.454545
	D4	1.08333	1	1.39286		0.984375	1.5	0.893617	1.08571	0.816901	0.454545
	D5	1.08333	0.904762			1.0625		1	1.05714	0.985915	0.931818
	D6	1	0.97619	1.25		0.84375		0.914894	1.2	0.859155	0.840909
	D7	1.13333	0.928571	1.28571		0.828125		0.957447	1.08571	0.746479	0.818182
	D14	1	1.07143	1.10714		0.734375		0.829787	1.05714	0.873239	0.704545
	D21	0.766667	1.30952	0.821429					1.08571	0.802817	0.840909
	D30	0.633333		1.07143						0.577465	0.75
		Nearst Neighbor (control)
Figure 2C		Animal 1	Animal 2	Animal 3	Animal 4	Animal 5
	Control	24.1013	28.8245		22.368	26.1387
	D7 PLX	87.7773	85.5551		49.7533	34.2307
	D1	57.7667	117.722		53.684	36.292
	D2	45.2113	44.8423	51.8333	34.4	24.5667
	D3	29.604	71.3479	28.8527	26.4733	23.7391
	D4	29.7007	34.4337	26.866	28.376	22.736
	D5	26.9132	26.7062	25.1253	28.0953	20.7653
	D6	29.2447	34.5787	25.3767	27.49	23.2733
	D7	29.07	39.1292	24.3193	30.362	23.6407
	D14	25.76	33.4315	30.5433	25.4137	25.5087
	D21	32.7322	33.4985	26.2733	23.246	26.9547
	D30	33.6392	32.6268	30.378		31.326
	Number of microglia (P2Y12KO)
Figure 2D		Animal 1	Animal 2	Animal 3	Animal 4
	Control	1	1	1	1
	D7 PLX	0.323944	0.24359	0.375	0.321739
	D1	0.394366	0.25641	0.3125	0.382609
	D2	0.140845	0.448718	0.4	0.426087
	D3	0.929577	1.0641	0.6375	0.686957
	D4	0.760563	1.15385	0.8375	0.843478
	D5	1.16901	1.11538	0.7125	0.747826
	D6	0.732394	1.08974	0.6875
	D7	1.09859	1.24359	0.9	0.921739
	D14	0.901408	1.08974	0.8	0.817391
	D21	0.873239	1.07692	0.9	0.704348
	D30	0.760563	0.961538
	Nearest neighbor (P2Y12KO)
Figure 2E		Animal 1	Animal 2	Animal 3
	Control	37.3203	40.3941	39.7467
	7D PLX	63.2271	99.3552	68.4568
	D1	67.2404	65.311	60.1715
	D2	68.7648	60.766	58.3625
	D3	49.6452	40.4199	56.0433
	D4	32.126	33.4796	45.1309
	D5	41.9675	32.802	35.9869
	D6	38.1236	37.1856	38
	D7	38.7279	33.6424	39.7792
	D14	44.7537	36.6339	39.1373
	D21	41.5038	37.5124	37.4338
	D30	42.1353	43.1427	38.2503
Figure 2F	PLX/Control	CX3CR1-GFP	P2Y12 KO
		0.333333	0.323944
		0.452381	0.24359
		0.25	0.375
		0.25	0.321739
		0.34375
		0.574074
		0.106383
		0.197183
		0.295455
Figure 2G	D2/PLX	CX3CR1-GFP	P2Y12 KO
		2.5	0.434783
		2	1.84211
		2.57143	1.06667
			1.32432
		1.31818
		1.6129
		6
		1.78571
		1.30769
Figure 2H	D5/Control	CX3CR1-GFP	P2Y12 KO
		1.08333	1.16901
		0.904762	1.11538
		1.0625	0.7125
		1	0.747826
		1.05714
		0.985915
		0.931818
Figure 2I	D21/Control	CX3CR1-GFP	P2Y12 KO
		0.766667	0.873239
		1.30952	1.07692
		0.821429	0.9
		1.08571	0.704348
		0.802817
		0.840909

## Sheet: Figure 2-supplementary figure 1
Figure 2-Source Data 2: GFAP expression following microglial depletion
Figure 2-figure supplementary 1: GFAP expression is unchanged following microglial depletion. Representative confocal images of astrocytes immunoreacted for GFAP in fixed brain sections from mice in control conditions (A) after PLX treatment (B) and after 30 days of repopulation (C). Qualitatively astrocyte morphology and expression of GFAP did not change following microglial depletion. (D) The p…
Figure 2-supplementary figure 1D
	Control	PLX	30D
	0.193802	0.239184	0.344617
	0.233154	0.148082	0.252942
	0.228021	0.269908	0.310434
			0.231506
			0.21673
