# Supplementary material for: The role of P2Y12 in the kinetics of microglial self-renewal and maturation in the adult visual cortex in vivo
Source: eLife. 2021 Jul 12;10:e61173. doi: 10.7554/eLife.61173 (PMC8341987; doi:10.7554/eLife.61173)
Supplement: Figure 2—source data 2. [file elife-61173-fig2-data2.xlsx]

## Sheet: Figure 2-Source Data 2
Figure 2-Source Data 2: Source data for the GFAP expression following microglial depletion
Figure 2-figure supplementary 1: GFAP expression is unchanged following microglial depletion. Representative confocal images of astrocytes immunoreacted for GFAP in fixed brain sections from mice in control conditions (A) after PLX treatment (B) and after 30 days of repopulation (C). Qualitatively astrocyte morphology and expression of GFAP did not change following microglial depletion. (D) The p…
Figure 2-supplementary figure 1D
	Control	PLX	30D
	0.193802	0.239184	0.344617
	0.233154	0.148082	0.252942
	0.228021	0.269908	0.310434
			0.231506
			0.21673
