# Supplementary material for: The role of P2Y12 in the kinetics of microglial self-renewal and maturation in the adult visual cortex in vivo
Source: eLife. 2021 Jul 12;10:e61173. doi: 10.7554/eLife.61173 (PMC8341987; doi:10.7554/eLife.61173)
Supplement: Figure 3—source data 1. [file elife-61173-fig3-data1.xlsx]

## Sheet: Figure 3 
Figure 3-Source data 1: Source data for microglial repopulation
Figure 3: Microglia self-renewal via residual cells in the visual cortex. (A) Representative in vivo two-photon imaging of microglial division in CX3CR1-GFP awake mice. Inset is a magnified image of the dividing doublet microglia, which appears as an elongated cell body on day 1 and divides into two cells on day 2. The two microglia then migrated away from one another over the subsequent 2 days. …
3B		Animal 1	Animal 2	Animal 3
# of doublet per field	Ctl	0		3
	D7 PLX	0		0
	D1	0	6	0
	D2	3	9	1
	D3	13	12	5
	D4	20	15	7
	D5	19	10	9
	D6	9	10	10
	D7	11	12	10
	D14	9	8	7
	D21	4	5	9
	D30	1	3	7
3C		Animal 1	Animal 2	Animal 3
% doublet cells of total # of microglia	Ctl	0		6.81818
	D7 PLX	0		0
	D1	0	21.4286	0
	D2	12	25	5.88235
	D3	21.6667	24.4898	25
	D4	34.4828	26.7857	35
	D5	27.1429	16.129	21.9512
	D6	14.7541	18.5185	27.027
	D7	20.7547	20.6897	27.7778
	D14	14.5161	13.5593	22.5806
	D21	7.01754	8.47458	24.3243
	D30	2.43902	5.76923	21.2121
3D
% doublet cells per field		CX3Cr1-GFP					P2Y12KO
	Control	0		3			0	0	0
	D7 PLX	0		0				0	2
	D1	0	6	0			0	6	6
	D2	3	9	1			8	9	10
	D3	13	12	5			7	7	18
	D4	20	15	7			10	10	20
	D5	19	10	9			13	6	10
	D6	9	10	10			20	4	10
	D7	11	12	10			15	13	9
	D14	9	8	7			9	10	15
	D21	4	5	9			7	6	14
	D30	1	3	7			6	9	12
3E
% doublet cells of total # of microglia	CX3Cr1-GFP						P2Y12KO
	Control	0		6.81818			0	0	0
	D7 PLX	0		0				0	15.3846
	D1	0	21.4286	0			0	27.2727	30
	D2	12	25	5.88235			20	39.1304	50
	D3	21.6667	24.4898	25			17.9487	16.2791	40
	D4	34.4828	26.7857	35			18.8679	21.7391	41.6667
	D5	27.1429	16.129	21.9512			22.0339	14.6341	18.8679
	D6	14.7541	18.5185	27.027			34.4828	10.2564	17.2414
	D7	20.7547	20.6897	27.7778			25	25.4902	12.3288
	D14	14.5161	13.5593	22.5806			13.2353	17.2414	23.4375
	D21	7.01754	8.47458	24.3243			10.2941	9.375	20.8955
	D30	2.43902	5.76923	21.2121			8.4507	17.6471	23.0769
3H	Number of cells in V1
	Doublet	Singlet
	104	153
	101	150
	90	132
	73	145
	107	116
	76	176
	109	186
	97	282
3I	Soma Perimeter (um)
	Doubet	23.5404	23.6668	28.4791	36.4678	19.8338	28.3612	26.221	26.2706	33.3535	26.5218	23.5576	28.7078	30.3846	29.8131	25.0747	23.9711	29.3332	24.2395	21.3051	18.5352	26.7134	23.8899	28.7281	35.5822	27.4018	27.8705	39.9318	20.6439	40.7238	27.0022	23.1925	36.2167	22.7467	18.3366	23.3207	15.4679	29.4752	21.0401	20.2974	18.5205	28.6211	23.7052	37.8269	21.6103	17.0535	31.8105	29.9025	25.0699
	Singlet	15.4005	18.9236	18.1273	19.2762	15.4208	14.5546	13.9409	16.5227	18.8515	15.328	15.3837	15.4178	12.0492	14.1265	14.1873	15.6586	12.3656	22.2231	12.0427	16.2788	13.5598	16.5114	16.8679	12.3794	15.9702	17.4368	18.672	14.3979	18.937	18.4424	12.1101	11.9478	16.7963	16.6513	16.0531	16.9197	17.0475	8.84419	24.7846	14.3323	15.2555	11.2132	21.4661	16.0289	14.8791	18.4968	19.287	15.4592
	Control	13.3487	13.5058	13.6254	16.2607	15.1916	12.0988	19.8912	15.0324	15.164	11.5878	17.9292	12.492	15.0198	16.4329	16.7635	14.9659	18.546	17.3241	15.7574	12.7354	16.8054	12.5611	18.8912	19.9478	13.4303	17.2965	20.8567	14.366	16.7186	23.6672	11.2365	16.136	16.8123	15.9944	12.7164	12.1938	17.2192	15.2641	13.2279	17.2521	15.9305	17.5408	16.0177	15.0401	17.7523	11.7959	12.5835	12.3505
3J	Soma Area (um)
	Doubet	132.807	130.385	168.197	208.244	92.946	136.718	126.846	133.738	137.65	173.971	103.004	138.208	185.892	136.346	126.474	149.757	132.993	138.208	59.791	93.877	183.657	128.709	154.6	188.314	115.298	108.033	224.449	110.269	241.026	131.503	113.808	149.012	117.347	70.594	123.121	71.898	141.002	95.926	83.633	58.301	138.022	83.074	208.244	100.024	48.243	196.137	156.649	104.494
	Singlet	71.526	106.171	115.112	117.16	75.065	74.878	51.782	75.065	104.494	81.211	55.134	76.555	43.586	69.104	61.84	56.811	39.302	121.445	45.449	75.251	52.713	83.074	92.387	52.899	90.711	78.417	119.954	69.104	95.926	81.398	51.036	48.429	81.584	99.838	79.162	86.427	99.093	26.636	95.554	68.732	78.604	40.978	130.944	78.604	65.006	100.955	128.895	79.721
	Control	64.075	61.467	65.751	71.898	78.604	54.017	116.229	83.447	82.888	48.615	94.064	46.38	73.388	55.879	54.389	68.732	117.533	102.073	75.065	61.467	104.681	56.438	100.583	94.436	59.046	89.221	115.298	63.516	66.124	152.364	47.87	67.8	67.614	73.202	52.34	45.449	80.466	83.633	60.909	83.819	89.593	94.064	73.947	73.388	105.239	53.272	52.899	47.684
3K	Soma Elongation
	Doubet	2.25972	1.96633	2.53505	2.71662	1.43016	1.41995	2.00385	1.53939	3.19295	1.83791	2.12228	1.6684	2.04226	1.96677	2.14508	2.25473	3.19659	1.76561	3.25306	2.22441	1.78568	2.25602	2.40696	1.67764	3.28346	1.7614	1.73674	2.13807	1.68554	1.89892	2.4888	2.75432	2.5815	2.80138	2.84348	1.96554	1.46952	1.55633	2.60666	2.61979	2.63698	2.00511	1.41364	1.73081	2.89995	1.23249	1.51517	4.30078
	Singlet	2.0349	1.4595	1.52877	1.47356	1.40257	1.81682	1.67403	1.5402	1.38	1.55236	1.47894	1.42701	1.5175	1.48883	1.52838	2.53418	1.84271	1.25772	1.82109	1.19174	1.32136	1.41182	1.851	1.32253	1.45081	2.64149	1.67961	1.46869	1.35302	2.17079	1.67053	1.5833	1.59362	1.17423	1.63897	1.48057	1.20438	1.83851	2.04611	1.221	1.32773	1.2585	1.87406	1.88744	2.05183	1.41101	1.51779	1.47542
	Control	1.40533	1.32861	1.4611	1.43843	1.28647	1.42819	1.73595	1.39082	1.36208	1.4281	1.67759	1.22682	1.45343	2.61525	2.18168	1.67329	1.45669	1.60407	1.5072	1.25549	1.24811	1.58345	2.01545	2.56067	1.97567	1.812	1.80393	1.66485	1.95474	1.45999	1.62893	1.96798	2.41299	1.3389	1.37318	1.23555	1.94325	1.35723	1.44111	1.88266	1.49794	1.36907	1.91427	1.86943	1.49956	1.34401	1.51588	1.51907
3L	Long/Shortaxis
		Doublet	Singlet	Control
	23.5404	2.25972
	23.6668	1.96633
	28.4791	2.53505
	36.4678	2.71662
	19.8338	1.43016
	28.3612	1.41995
	26.221	2.00385
	26.2706	1.53939
	33.3535	3.19295
	26.5218	1.83791
	23.5576	2.12228
	28.7078	1.6684
	30.3846	2.04226
	29.8131	1.96677
	25.0747	2.14508
	23.9711	2.25473
	29.3332	3.19659
	24.2395	1.76561
	21.3051	3.25306
	18.5352	2.22441
	26.7134	1.78568
	23.8899	2.25602
	28.7281	2.40696
	35.5822	1.67764
	27.4018	3.28346
	27.8705	1.7614
	39.9318	1.73674
	20.6439	2.13807
	40.7238	1.68554
	27.0022	1.89892
	23.1925	2.4888
	36.2167	2.75432
	22.7467	2.5815
	18.3366	2.80138
	23.3207	2.84348
	15.4679	1.96554
	29.4752	1.46952
	21.0401	1.55633
	20.2974	2.60666
	18.5205	2.61979
	28.6211	2.63698
	23.7052	2.00511
	37.8269	1.41364
	21.6103	1.73081
	17.0535	2.89995
	31.8105	1.23249
	29.9025	1.51517
	25.0699	4.30078
	29.9711	2.51713
	13.7872	1.64913
	19.8589	1.50567
	24.5071	2.54616
	23.1221	1.62514
	24.814	1.77273
	20.5378	1.71921
	23.1221	1.40758
	27.3125	2.02439
	29.183	2.11352
	18.8213	1.86458
	22.6154	1.30757
	23.2249	1.87713
	29.4851	2.86782
	20.2482	1.6055
	20.9512	1.39193
	22.2831	1.12444
	38.3552	1.84544
	19.2076	2.4673
	23.8028	2.05869
	18.4092	2.23907
	21.2762	1.19728
	27.0362	2.01491
	26.322	1.91596
	25.5373	2.49588
	26.7402	1.56355
	25.5947	1.76831
	29.5585	2.76989
	25.7398	1.94293
	26.0971	1.75243
	23.7937	2.24658
	19.8118	2.01061
	17.7959	2.41379
	19.7989	2.4396
	26.391	2.18774
	24.1692	2.52414
	25.7894	2.64686
	22.6724	1.52894
	28.9845	2.4913
	27.7423	2.58218
	22.7363	1.85844
	19.9715	1.79151
	23.905	1.39986
	16.9439	2.59974
	33.1692	1.3029
	17.9124	2.05483
	24.53	2.27183
	20.1377	1.62122
	22.8148	1.30776
	20.2123	2.3715
	26.1549	1.59442
	17.1644	1.62345
	19.9296	1.85554
	13.9629	2.30124
	10.9538	1.68297
	31.8671	1.36016
	25.9814	2.76443
	22.823	1.74622
	17.6901	2.35897
	30.1489	1.71754
	18.631	1.52972
	16.4428	1.50405
	22.1687	2.93583
	23.5619	2.39714
	17.2011	2.16396
	32.8653	2.65049
	25.3375	2.11723
	28.1204	1.57213
	18.4316	1.93613
	15.7	1.60689
	25.8261	2.10274
	23.735	1.6219
	23.1899	1.51204
	24.1459	1.68306
	26.9616	1.54591
	16.4795	1.7776
	23.3643	2.06539
	28.3979	2.07874
	24.77	1.32699
	27.7479	1.81928
	31.4307	1.47806
	29.82	3.08526
	20.9374	1.46613
	30.6491	1.62349
	36.555	1.62952
	24.8274	1.43221
	19.7756	1.77918
	22.454	1.88671
	22.1467	2.20067
	19.3155	2.06204
	18.9262	1.98277
	21.8101	2.21571
	22.4782	2.65944
	17.8459	1.17735
	20.527	1.23666
	23.7182	1.42605
	22.8869	2.98907
	22.5265	1.58862
	19.2732	1.68143
	29.6103	1.64266
	21.9827	2.07798
	23.2572	1.62886
	11.9987	1.7594
	17.6595	2.83263
	24.7631	2.26035
	20.0065	1.53711
	19.0449	1.65203
	26.3802	2.24459
	21.2482	1.57733
	16.2728	2.27927
	19.8477	2.64361
	21.1662	1.48769
	21.5762	1.86519
	26.2542	2.01264
	22.9163	2.16059
	27.1554	1.27444
	22.3569	1.92349
	17.7229	1.47285
	16.7242	1.29668
	28.7725	1.35977
	20.9413	1.68836
	19.0056	1.27278
	15.0332	1.91224
	22.4756	2.90185
	17.3604	1.34956
	22.0203	1.63216
	27.413	1.16651
	14.2836	2.32884
	18.4204	1.79583
	27.536	1.54736
	24.4376	1.60098
	19.199	2.53109
	18.8451	1.75148
	22.3094	2.15381
	18.9482	2.5929
	15.568	1.40539
	21.9694	1.32322
	23.82	1.42508
	25.1977	3.10544
	28.6789	2.3744
	13.9284	2.22085
	25.738	1.99919
	16.8252	1.47276
	26.4778	1.30136
	20.3185	1.44289
	19.5861	1.53568
	26.4709	1.35983
	23.1209	2.65437
	29.6206	1.72677
	22.177	2.06946
	24.3513	2.37062
	31.3116	1.4883
	17.5624	2.37171
	29.9137	2.45257
	15.0479	2.14234
	22.1342	1.41389
	28.8835	2.21462
	20.2797	1.75063
	43.6236	1.16346
	40.1001	2.53441
	26.5663	1.96744
	24.4109	2.22405
	20.4946	2.07914
	21.1265	1.62156
	20.4407	2.35368
	20.2672	2.41906
	22.577	2.35531
	24.5442	1.71327
	32.9974	1.59428
	30.23	2.13287
	26.4726	1.9778
	17.9309	2.04261
	43.9059	1.49206
	17.7553	1.96761
	12.7139	3.03708
	28.7812	2.6653
	23.7734	1.52004
	36.0121	1.51421
	18.9499	1.70858
	23.2244	1.91277
	14.6759	2.36693
	27.5641	1.38346
	19.4627	2.36241
	25.6094	3.4771
	16.978	2.01315
	28.9728	2.56662
	21.1649	2.09527
	41.4325	2.59873
	31.5965	2.71976
	50.8304	2.23392
	21.4398	1.70795
	20.6659	1.47058
	33.1377	2.13871
	17.3625	1.39609
	30.3017	1.77537
	17.6064	2.69609
	22.0954	2.15101
	16.7246	2.61841
	25.24	4.09332
	19.6508	2.86345
	22.2097	3.56351
	22.1398	1.59261
	15.7454	1.81141
	19.6444	1.2725
	24.3923	1.88687
	20.426	2.40091
	18.394	2.38323
	15.8222	1.92125
	26.7152	1.20142
	31.3811	3.13827
	32.1774	2.20818
	16.3703	1.94136
	27.7173	4.21185
	15.8934	2.96081
	30.1472	1.5518
	27.6664	2.56274
	22.4752	2.83439
	19.0375	1.85364
	22.8205	2.06903
	19.5075	2.38575
	18.7855	2.36136
	25.9292	2.29413
	26.0872	1.48177
	45.7467	2.52522
	20.1649	2.40966
	23.4467	1.683
	20.5762	1.98276
	24.0915	3.14986
	32.3297	1.52243
	27.1269	2.59133
	21.3759	1.90994
	35.8118	1.53864
	20.7885	2.85589
	24.4044	1.59342
	19.9676	1.98132
	25.341	1.97184
	28.7833	2.70287
	18.9012	2.08318
	25.729	2.04239
	29.6129	3.70503
	23.9594	2.29019
	32.3694	1.87846
	18.4148	1.68731
	21.044	2.69879
	26.8779	3.92211
	21.3686	1.51573
	17.6513	2.36918
	22.3302	1.82053
	21.9495	2.84055
	19.4014	2.03269
	27.3824	4.88441
	19.4748	2.32616
	16.7311	1.98521
	21.8632	1.87696
	16.7609	1.80954
	35.6319	2.04216
	24.7216	2.0324
	23.7272	1.52012
	32.5283	1.46642
	24.9599	1.65192
	21.6539	1.65072
	17.776	1.279
	22.6759	2.80774
	14.0194	1.58833
	21.6012	2.16514
	24.3647	2.30367
	30.912	2.30143
	19.3923	1.6783
	18.4437	1.5538
	19.9607	1.91174
	19.0842	2.33451
	20.9435	2.1387
	19.3837	1.96201
	19.858	1.60811
	20.5844	1.34019
	26.5896	2.80723
	26.8075	1.94847
	16.7441	2.0554
	13.6439	1.32319
	19.7907	2.26261
	22.5421	1.68043
	22.4122	1.5426
	21.1062	2.03261
	36.5727	2.0368
	19.3453	2.41093
	17.0626	2.41536
	18.8381	2.18479
	31.3332	1.30854
	24.6849	1.42608
	28.3729	2.41646
	19.9504	2.97798
	26.6513	1.37897
	21.9551	2.10508
	25.4299	2.04991
	24.4993	1.80182
	22.3638	2.00781
	23.9586	2.74179
	26.189	2.03067
	20.3466	2.4034
	33.1549	2.2724
	19.1489	1.92307
	29.2106	2.11657
	17.8058	2.0117
	26.2546	1.79578
	25.1523	1.9192
	21.2218	1.51933
	19.4821	1.3946
	15.9322	2.47488
	22.53	1.34876
	22.3159	2.76973
	18.2007	1.45342
	24.3966	3.70928
	23.1062	2.30395
	27.0099	1.63593
	19.7777	1.29419
	22.6116	1.8955
	20.0954	2.37197
	19.5145	1.22841
	24.4644	2.08068
	35.2559	2.28572
	13.9448	1.29993
	30.4666	1.71655
	18.5917	3.02719
	23.0479	1.58201
	16.6586	3.83322
	24.5753	1.96667
	22.5451	2.55315
	18.2054	2.1679
	14.5313	1.90827
	14.6582	1.43609
	25.4916	2.09215
	24.9331	2.31262
	25.4078	3.12752
	24.9392	1.7404
	22.7553	2.68392
	22.0281	3.10145
	20.6703	2.05594
	16.3811	2.6095
	22.6344	1.5612
	24.678	2.76471
	19.2823	1.44807
	24.7009	2.57786
	22.5839	1.48678
	15.7052	1.71439
	20.7454	2.03517
	22.9266	1.84203
	34.3371	1.33658
	22.9318	1.98739
	23.7769	2.0279
	25.4269	2.10767
	23.3945	2.35401
	31.2184	2.37663
	16.4359	1.31094
	17.7618	1.60522
	22.9063	1.76421
	16.284	1.66903
	17.4277	1.93713
	30.4057	1.66231
	23.4195	2.69023
	27.6301	3.14877
	22.4299	2.17887
	24.6245	1.78637
	20.9935	2.22608
	21.2072	2.61153
	26.0911	2.18132
	21.7044	1.56893
	26.5417	2.13587
	13.9474	2.2401
	21.8839	1.58205
	15.9361	1.53239
	19.0906	1.94474
	17.8934	1.85595
	28.8878	1.62161
	17.9154	1.62902
	18.4126	2.13901
	33.1329	1.67086
	17.4558	1.83785
	16.5019	2.28012
	19.0967	1.85076
	19.7562	2.90631
	25.1968	2.10744
	18.4614	1.73228
	22.0298	1.72468
	21.1282	1.3596
	13.9909	2.28683
	19.7251	1.25698
	95.6461	3.21766
	15.8692	1.92082
	19.186	1.62651
	29.1023	1.96387
	31.4536	1.6781
	16.7833	2.04866
	24.1549	1.91794
	21.1739	2.70823
	17.6655	2.0132
	36.924	2.03453
	37.7587	1.89975
	23.3561	1.68051
	15.5296	2.19168
	20.36	1.81252
	14.5028	2.06725
	17.2542	2.79613
	17.3323	1.21508
	63.1308	1.93973
	19.3177	1.12019
	19.3017	1.70849
	43.5365	3.55883
	17.4126	1.79792
	14.5158	2.3613
	20.5887	1.75119
	20.4842	1.99089
	17.0639	2.03727
	19.6176	3.02281
	25.751	1.82432
	25.2551	1.86389
	15.751	2.48519
	25.0401	1.35675
	21.4726	1.8402
	24.1972	1.67546
	30.8006	2.24121
	20.4407	2.69172
	26.4661	1.57695
	31.3893	1.72287
	16.0906	1.94714
	35.1269	1.8326
	22.9115	1.12125
	29.9379	2.2759
	20.893	2.17722
	27.7903	2.55047
	31.5956	1.68324
	20.741	2.24842
	32.8066	1.56199
	19.0954	2.53302
	21.2287	2.15729
	34.6206	1.64568
	18.9702	2.80907
	23.5019	2.30171
	22.1398	2.51835
	23.4424	1.39591
	19.5304	2.64374
	34.6202	1.3744
	19.1933	1.44087
	18.3185	1.86051
	34.3448	1.629
	19.8218	2.67287
	35.0837	2.66156
	21.8658	2.16869
	22.6392	1.81778
	28.0867	1.69261
	28.934	1.63905
	25.0919	1.30159
	30.413	1.92684
	20.6573	2.00969
	22.4631	2.66332
	35.4419	1.3061
	26.183	1.82648
	17.7665	1.87185
	23.183	1.60055
	29.8161	1.79493
	25.6944	1.74914
	17.0617	1.74412
	22.1247	3.08539
	15.7704	2.15324
	19.331	3.16319
	27.6707	2.07423
	25.4385	1.77596
	15.5688	1.61061
	17.943	1.80871
	30.066	1.4608
	22.6211	1.67034
	21.4817	1.48401
	31.9309	3.53572
	29.063	1.67221
	16.4178	2.25069
	24.8748	2.45835
	18.2961	1.36701
	27.7398	1.18581
	34.3263	3.32852
	18.5209	1.66138
	20.2693	2.09743
	14.8861	2.02425
	20.3315	2.42812
	25.9776	2.32163
	19.9702	2.14687
	22.1877	1.56467
	19.6025	1.90647
	22.4834	1.80391
	17.5874	1.40965
	27.5865	1.76319
	17.7505	1.89998
	18.8222	1.60187
	27.8576	2.03339
	20.8187	3.07545
	27.8459	2.23975
	22.5731	1.80795
	25.3332	2.18739
	26.7311	1.90873
	20.5075	1.35307
	21.2296	1.491
	20.0246	2.07788
	14.9681	2.5535
	22.0885	1.43438
	21.8071	3.38729
	23.5827	2.90683
	19.9042	1.53074
	22.1601	2.10383
	18.9754	1.63014
	27.3526	1.90501
	21.7549	1.64527
	24.4018	1.88965
	18.9232	2.95819
	22.8425	2.21403
	21.0924	2.29958
	19.2818	2.31288
	14.6426	1.2387
	21.606	1.87715
	29.2089	2.3044
	37.4484	1.99136
	26.464	2.92275
	20.4946	1.77549
	22.0777	2.49219
	19.4463	2.19212
	19.117	1.4589
	21.9206	2.20006
	22.1092	2.25341
	16.9098	1.27544
	22.5628	4.06522
	17.5373	2.01552
	17.8757	1.6597
	19.2154	2.59589
	27.1653	1.65124
	21.2732	1.62805
	20.0449	2.11696
	18.2339	1.11809
	27.4748	2.5187
	18.9745	1.95945
	22.8002	2.43578
	28.0233	1.56904
	22.5744	2.43064
	17.186	2.44578
	33.0837	2.12125
	21.1852	1.89369
	19.4959	2.71472
	16.4247	2.20898
	26.1476	1.16928
	26.1998	2.24196
	19.6116	2.52535
	17.6094	1.6457
	22.6979	3.41005
	29.5624	2.36672
	17.2723	1.95254
	18.9741	1.86846
	21.287	2.09923
	19.9236	1.87843
	35.9521	1.79058
	19.1519	3.05229
	16.987	3.00591
	19.2602	1.92999
	22.199	2.10231
	50.0363	2.4725
	17.3185	1.74607
	22.1575	1.82746
	15.6288	1.97762
	20.1385	2.09531
	20.921	1.52641
	27.697	1.52984
	18.4031	1.89315
	18.5658	2.85957
	17.3336	2.49936
	19.8472	2.09598
	19.1977	2.20218
	18.4622	2.96397
	20.3258	1.89199
	25.1631	1.75829
	19.5874	2.12164
	24.5956	1.74949
	17.1873	1.93191
	22.6232	2.53145
	22.9098	1.88682
	29.2969	2.82491
	15.0371	1.67699
	19.6789	1.71877
	16.2296	2.27524
	27.1817	2.39668
	14.6754	1.94808
	25.5788	1.37921
	17.2935	2.23334
	18.6836	1.70393
	21.4631	2.38762
	20.6215	2.27209
	26.656	1.4887
	22.2029	2.10825
	25.4761	2.40796
	26.3164	1.6238
	15.9905	3.7215
	14.4968	2.28299
	22.9392	1.58258
	20.9741	1.66887
	19.0173	2.22772
	37.0354	4.79174
	14.9383	2.2118
	15.7246	2.50523
	24.1933	2.06353
	17.1455	1.70876
	22.3401	2.14644
	18.1636	1.74749
	23.2857	2.40075
	15.2758	3.02964
	18.7566	1.74744
	40.4748	2.22923
	19.3026	1.60163
	26.7544	1.75384
	22.9379	2.1794
	27.6802	3.65998
	16.4955	2.25394
	16.6729	2.56745
	23.5788	2.55264
	26.0432	1.7294
	17.3021	2.26079
	22.4968	1.95509
	21.2382	2.39802
	17.4873	2.48635
	17.1839	1.82106
	19.3004	3.06409
	19.2918	1.51101
	32.3224	2.12288
	24.0867	1.83691
	19.1498	1.61115
	20.9422	2.19927
	14.6439	2.6312
	21.8179	1.8726
	14.391	2.47535
	16.577	2.17854
	24.9184	1.92709
	13.0203	2.09345
	16.5537	3.20583
	14.6159	1.81587
	39.9163	2.39498
	14.1329	1.99687
	20.0988	2.18771
	18.3319	2.44475
	17.7419	2.60984
	21.8015	1.89331
	24.4851	1.63225
	18.8429	2.70441
	27.8235	2.83112
	18.0419	1.92772
	22.8619	1.72683
	20.7186	2.76912
	15.7993	2.5412
	28.1787	3.42578
	28.9832	1.53116
	34.1925	1.26169
	23.4981	1.7854
	21.5555	1.74466
	17.1946	2.63984
	25.0181	1.23988
	19.6992	3.31284
	19.1338	2.04991
	18.2706	1.36484
	20.9767	1.93039
	18.6763	2.10416
	25.2011	2.12873
	20.1325	2.38867
	17.7471	1.71633
	21.0272	3.15145
	16.3202	1.36199
	32.6038	1.61274
	23.9258	1.72383
	27.0522	2.073
	24.1174	3.11748
	17.1416	1.98836
	21.1588	2.25448
	33.6724	1.45507
	16.6405	1.39437
	14.5162	1.77224
	17.946	2.43737
	25.41	2.91422
	18.842	1.68441
	20.5999	1.59529
	17.4161	2.69531
	24.4808	1.35385
	24.9037	1.92552
	21.656	2.92653
	14.3608	1.99423
	18.8356	1.76028
	19.423	2.56759
	16.4385	2.26925
	19.0199	1.87945
	26.5339	2.8868
	18.7613	2.45718
	16.9145	2.31656
	20.8895	2.59096
	16.6133	2.1832
	16.6457	1.85192
	22.1191	1.6699
	17.2857	1.79666
	23.7868	1.72441
	18.3863	2.04665
	21.3487	2.27292
	24.8666	1.91558
	32.3742	1.73323
	15.7203	2.21159
	21.0319	3.64787
	25.4903	1.83943
	21.6513	2.85094
	13.4433	2.03672
	24.0742	1.97584
	34.7298	2.66208
	15.4005		2.0349
	18.9236		1.4595
	18.1273		1.52877
	19.2762		1.47356
	15.4208		1.40257
	14.5546		1.81682
	13.9409		1.67403
	16.5227		1.5402
	18.8515		1.38
	15.328		1.55236
	15.3837		1.47894
	15.4178		1.42701
	12.0492		1.5175
	14.1265		1.48883
	14.1873		1.52838
	15.6586		2.53418
	12.3656		1.84271
	22.2231		1.25772
	12.0427		1.82109
	16.2788		1.19174
	13.5598		1.32136
	16.5114		1.41182
	16.8679		1.851
	12.3794		1.32253
	15.9702		1.45081
	17.4368		2.64149
	18.672		1.67961
	14.3979		1.46869
	18.937		1.35302
	18.4424		2.17079
	12.1101		1.67053
	11.9478		1.5833
	16.7963		1.59362
	16.6513		1.17423
	16.0531		1.63897
	16.9197		1.48057
	17.0475		1.20438
	8.84419		1.83851
	24.7846		2.04611
	14.3323		1.221
	15.2555		1.32773
	11.2132		1.2585
	21.4661		1.87406
	16.0289		1.88744
	14.8791		2.05183
	18.4968		1.41101
	19.287		1.51779
	15.4592		1.47542
	20.2784		1.94217
	17.9555		1.60706
	19.7518		1.3063
	17.3794		1.59693
	17.852		1.81424
	14.4683		1.90561
	12.9262		1.7722
	16.9944		1.6519
	18.161		1.84593
	18.3293		1.47771
	10.6452		1.56653
	10.4502		2.4056
	17.5865		1.13447
	15.5145		1.33892
	13.5347		1.34902
	17.6862		1.56246
	16.9659		1.73337
	20.9189		1.45738
	13.9814		1.4732
	17.1933		1.92568
	20.9836		1.93333
	14.5507		1.3896
	15.6508		1.55562
	16.3436		1.49074
	17.2072		1.28405
	13.1834		1.34363
	17.852		2.24525
	18.3517		2.88299
	16.0777		1.59754
	12.811		1.63872
	11.6185		1.38831
	21.8727		2.01743
	18.5425		2.11231
	16.6245		1.69015
	17.9322		1.64787
	30.634		1.79458
	15.8999		1.41094
	14.4493		1.37292
	12.7747		1.54409
	14.0656		1.22888
	13.4342		1.41614
	14.9508		2.32084
	16.5417		1.32612
	24.965		1.26585
	13.9417		1.07653
	19.8412		1.71977
	21.6077		1.3466
	13.3164		1.70717
	13.9353		2.23482
	14.7859		2.04274
	12.426		1.29644
	17.9085		1.34695
	17.7423		1.525
	17.7838		1.33518
	16.9702		1.95147
	17.5438		1.90643
	17.6133		1.19694
	18.6258		1.66691
	14.7031		1.16156
	14.3729		1.50304
	19.6219		2.03362
	15.0242		1.33166
	16.1178		1.90221
	16.9133		1.45388
	12.2171		1.70069
	24.9232		1.4524
	18.1774		1.52983
	9.60423		1.71597
	11.9767		1.69964
	17.5451		1.21189
	13.0479		1.63445
	17.4571		1.91786
	16.7795		1.42931
	14.8058		1.27789
	16.798		1.38572
	15.0548		1.13342
	9.74191		1.6182
	15.041		1.75673
	16.4713		1.4951
	16.3932		1.50843
	17.4532		1.79046
	19.1247		1.6677
	12.7972		2.20264
	14.9827		1.22812
	11.0829		1.88244
	13.1757		1.33293
	11.7259		1.54859
	11.9676		1.52208
	17.4057		2.06436
	13.1381		1.5032
	11.2365		1.70789
	19.1636		1.84001
	16.0035		1.40053
	14.1532		1.50537
	16.0065		1.41317
	13.5602		1.81959
	13.2249		1.46431
	12.9335		1.59554
	13.9245		1.28058
	15.8878		1.57532
	16.4238		1.32743
	16.3673		1.52305
	20.5939		1.29026
	19.401		1.33488
	20.4191		1.92268
	16.9085		1.50479
	18.8662		1.35167
	19.9482		1.33853
	18.7894		1.49104
	16.912		1.81562
	13.6159		1.49175
	15.3569		1.75402
	14.2719		1.43171
	17.5356		1.45519
	18.4169		1.63734
	19.4894		1.59571
	12.4592		1.49073
	14.3379		1.35368
	14.3302		1.82805
	13.7251		1.25817
	17.12		1.3463
	15.5904		1.2851
	13.1226		1.43601
	12.8606		1.32456
	14.1338		1.45668
	18.1036		1.46117
	18.839		1.28155
	25.9163		1.46278
	22.5485		1.58069
	14.6129		2.46624
	20.6569		1.45378
	20.2818		2.13846
	12.6176		1.4281
	18.4618		1.1296
	16.8515		1.99892
	16.8291		1.39986
	14.6038		1.26372
	20.2205		1.4084
	14.0479		1.37292
	16.3707		2.23941
	18.3755		1.66982
	13.0945		1.85233
	15.6733		1.66663
	10.3198		1.79082
	14.2874		1.95696
	17.4713		1.29229
	12.9724		1.46763
	20.4458		1.42931
	14.757		1.34437
	16.7052		1.1791
	16.3142		1.49111
	12.9517		1.87157
	11.0099		1.50168
	9.2227		1.30035
	14.5114		1.44061
	17.5503		2.03962
	12.5567		1.76415
	18.8179		1.47583
	18.8761		2.26606
	18.4842		1.33758
	12.3884		1.62203
	11.6711		1.70391
	15.6724		1.35626
	16.4791		1.54113
	18.5317		2.11141
	18.4225		1.44976
	14.2805		1.50677
	18.6798		1.57821
	15.1187		1.95986
	14.0449		1.9413
	13.1623		1.6455
	16.8671		1.23947
	18.637		1.52809
	18.4199		1.17423
	18.4199		1.17423
	19.0665		2.14631
	22.7622		1.61024
	17.4182		2.01936
	13.1774		1.58389
	19.0375		1.70226
	23.4691		1.72478
	16.495		1.73923
	16.4281		1.49548
	15.199		1.91621
	19.3781		2.74538
	20.1165		1.22343
	15.4092		1.52082
	19.284		1.25774
	15.0798		1.67183
	13.9586		1.19601
	14.593		1.96264
	11.8364		1.4737
	15.7039		1.87277
	14.9478		1.52387
	15.3254		1.89696
	13.6457		1.47964
	21.082		1.2159
	18.9927		1.81331
	12.5956		1.44663
	15.9033		1.56222
	15.874		1.72085
	13.3841		1.48561
	14.6241		1.47648
	15.8032		3.22124
	14.7328		1.30411
	17.3876		1.47656
	17.3738		2.29042
	11.8541		1.71684
	22.0104		1.55936
	13.6271		1.4961
	13.2369		1.76569
	16.8856		2.65839
	17.9909		1.2899
	14.9832		1.47272
	19.448		1.60524
	15.4273		1.26768
	23.0013		1.42907
	16.7143		1.25343
	21.9072		1.83892
	18.6142		1.82522
	15.1075		1.53459
	22.6746		1.22572
	17.9655		1.69826
	13.2982		1.52677
	13.6513		1.4706
	12.7937		1.66778
	15.0457		1.39841
	15.65		1.37599
	15.7121		1.59817
	16.618		1.38271
	16.1178		1.21693
	19.0384		1.49444
	16.4799		1.25343
	12.4454		1.33338
	20.0138		1.30345
	16.8407		1.28446
	24.8679		1.73097
	16.5158		2.52895
	16.5313		1.21822
	14.9551		1.75995
	15.7877		1.44318
	15.6905		1.52157
	11.4117		1.8715
	15.7626		1.59103
	14.5723		1.60329
	14.0751		1.55231
	10.1247		1.22016
	22.7514		1.24493
	18.3026		1.38678
	18.9745		1.18415
	14.4087		1.60057
	16.1381		1.43708
	15.5417		1.46001
	14.9383		1.6684
	11.4899		1.32857
	14.7536		1.65683
	15.0738		1.62476
	16.716		1.392
	18.2408		1.42937
	19.1165		1.7274
	14.4868		1.70346
	16.7967		1.70502
	17.6564		1.34943
	16.4394		1.9171
	12.893		1.81094
	12.7963		1.18673
	14.7389		1.79112
	21.1662		1.63935
	16.7682		1.62069
	16.382		1.28471
	16.4614		2.1702
	15.6806		1.84292
	20.0462		1.54959
	14.8338		1.64126
	17.1196		2.19603
	25.4912		1.71481
	17.1856		1.54694
	16.3064		1.62882
	13.7661		1.54949
	17.341		2.35366
	21.9046		1.62196
	17.4886		1.40668
	17.5227		1.98742
	16.1161		1.33765
	13.7747		1.39408
	17.5024		1.30738
	23.0716		1.34417
	17.7786		1.26247
	14.6741		1.61863
	14.5188		2.34688
	17.8369		1.43542
	16.1424		1.59685
	18.3962		1.66472
	15.9771		1.32291
	17.546		1.56998
	13.5965		1.88959
	14.5792		1.52542
	16.7631		1.84433
	18.7458		1.42937
	13.4713		1.73189
	14.2253		1.19269
	17.6539		2.02559
	17.6724		1.8698
	18.612		1.35948
	17.2715		1.75249
	16.4035		1.68735
	13.0242		1.41779
	16.0086		1.33377
	14.2486		1.5314
	18.9102		2.79827
	19.609		1.86253
	21.2417		2.29809
	18.7579		1.11399
	15.4523		1.42026
	18.145		1.22249
	17.0259		1.46582
	19.1157		1.37749
	12.9417		1.51806
	11.4497		1.67213
	13.536		1.48883
	11.5598		1.29004
	14.6629		1.36469
	18.7937		1.16922
	14.7302		1.41587
	20.9072		1.42958
	20.5231		1.66169
	17.8886		1.34216
	16.1368		1.47214
	18.1252		1.29522
	14.9007		1.42061
	12.2849		1.13357
	13.6401		1.71189
	12.1959		1.50529
	13.946		2.27011
	19.5904		1.56194
	14.5861		1.24683
	13.5637		2.17593
	15.0751		1.56522
	12.6897		1.59348
	15.2451		2.1794
	15.4376		1.62665
	16.9767		2.058
	15.5481		1.45272
	20.4165		2.83742
	18.7795		1.21349
	20.6211		1.31103
	17.331		1.47642
	16.3889		1.55699
	16.7398		1.534
	10.3621		1.54785
	18.2848		1.32764
	15.5848		1.61237
	19.5611		1.60881
	22.9111		1.55593
	19.7406		1.32669
	14.5913		1.2851
	16.4782		1.81312
	11.8205		1.50529
	19.5524		1.30395
	14.8399		1.37176
	16.7769		1.25533
	16.2279		1.24101
	16.2443		1.75638
	16.1135		1.4535
	21.0009		1.57134
	20.2063		1.24109
	26.4925		1.2991
	18.2141		1.76798
	14.6746		1.23644
	15.5248		1.30592
	15.8144		1.34294
	14.3056		1.24088
	12.7264		1.3614
	14.199		1.86364
	13.9202		1.6025
	14.6711		1.39082
	15.3902		1.6736
	15.9348		1.37024
	20.7596		1.57809
	15.6711		1.5597
	14.893		1.47356
	16.8908		1.30319
	19.3595		1.27054
	17.836		1.49158
	15.8489		1.21361
	15.7285		1.72423
	12.271		1.16613
	13.7911		1.60901
	16.322		1.7546
	11.8356		1.87811
	14.6513		1.33189
	14.246		1.17915
	16.0423		1.20197
	16.2434		1.76703
	19.5844		1.42428
	11.7022		1.5105
	14.6974		1.455
	15.5567		1.35507
	21.6677		1.98391
	15.8494		1.56496
	15.7743		1.38909
	16.9167		1.63953
	14.1027		2.5671
	11.2538		1.8846
	12.1053		2.18652
	14.9271		1.61131
	18.0729		1.12821
	19.3306		1.5785
	23.0505		1.28908
	16.9823		1.38929
	12.7777		1.65127
	16.0548		2.05922
	22.3768		1.46741
	17.9983		1.62452
	13.7644		1.86761
	14.372		1.3396
	15.9309		1.49636
	16.4864		1.21693
	17.4912		1.39712
	21.4212		1.49658
	14.7928		1.66704
	16.8127		1.66815
	15.1895		1.79823
	15.1174		1.86943
	16.3181		1.33377
	13.0453		1.29888
	17.4976		1.68426
	24.1791		1.25724
	11.7566		1.56962
	17.3556		1.39319
	16.1429		2.47964
	19.9327		2.65185
	19.7674		2.42979
	24.7782		2.03555
	17.7937		1.82522
	14.1567		1.54774
	18.7967		2.43918
	14.8908		1.72322
	13.0811		1.4666
	14.7605		2.04691
	16.9789		1.25533
	15.0289		1.7616
	18.5663		1.22713
	17.2218		2.00926
	16.7393		1.24012
	14.6556		1.81412
	18.8442		1.32025
	13.4074		1.59725
	16.4044		1.65187
	15.7553		1.67811
	16.6016		1.14769
	14.2348		1.3584
	15.1757		1.5186
	15.517		1.16741
	16.3871		2.07116
	26.5485		1.42183
	16.5058		1.50479
	15.2525		1.45343
	25.1601		1.87478
	13.2257		1.73847
	17.7971		1.49078
	17.9862		1.35863
	13.4907		1.70298
	18.5408		1.5434
	16.9115		1.27029
	12.6055		1.31111
	17.4122		1.3682
	18.0423		2.16121
	16.9361		1.48629
	13.1031		2.34862
	18.426		1.51335
	14.5451		1.21156
	18.4113		1.54906
	19.83		1.38823
	17.1662		1.28355
	18.858		1.66447
	18.5451		1.56329
	19.5663		2.52279
	19.6849		1.59142
	17.36		1.85653
	18.6379		1.9829
	18.4765		1.78749
	9.73198		1.7179
	19.4243		1.30017
	20.4575		1.58963
	22.0937		1.38914
	14.4351		1.26699
	12.1506		1.35016
	22.1023		1.50928
	15.5119		1.28562
	21.9586		1.20394
	15.0673		1.3307
	13.2961		2.67558
	20.9633		1.13279
	11.6905		1.94582
	10.0091		2.19481
	11.7816		1.70391
	13.1359		1.68182
	13.6081		2.0993
	17.1118		2.04424
	15.7445		1.40895
	10.5356		2.2931
	16.4717		2.09944
	17.0302		1.52459
	23.3453		1.2513
	12.6111		1.27415
	17.1476		1.57009
	15.4243		1.91744
	13.3397		1.52131
	21.4592		1.87836
	16.7264		1.88727
	16.713		2.28528
	15.1183		1.28004
	16.013		1.43777
	14.3461		1.55153
	12.5637		1.43182
	10.7523		1.65692
	21.4933		1.42304
	19.7877		2.18049
	11.8502		2.16355
	15.7026		1.32742
	12.7812		1.76354
	11.129		1.71731
	14.0388		1.36006
	10.8515		1.86349
	20.0432		2.28953
	24.8623		2.79821
	20.0445		1.37875
	24.4074		2.43861
	11.5455		1.31754
	20.5162		2.93816
	9.06042		1.53215
	18.65		1.87865
	15.076		1.47435
	17.738		2.36513
	16.0634		1.69887
	14.3189		1.57125
	12.7268		2.21992
	18.0889		1.27292
	17.6064		1.29721
	17.3401		1.71354
	22.3436		2.23544
	16.6396		1.50316
	15.2654		1.21435
	15.0742		2.02186
	12.0289		1.75104
	14.9439		1.48467
	17.0621		2.20501
	19.549		1.20854
	16.5857		1.25319
	14.5093		1.26271
	16.5227		2.49484
	15.7216		1.48049
	16.0056		1.9403
	12.7385		1.48467
	16.9456		2.39928
	16.527		2.66015
	14.3846		1.48305
	14.1886		1.85784
	15.2499		2.12919
	16.5581		1.24561
	22.7419		1.80528
	11.079		1.47253
	13.8515		1.38885
	13.1627		1.77788
	14.4735		1.66418
	15.3271		2.05287
	16.6893		2.33526
	13.3582		1.85712
	10.6236		1.8572
	17.4113		1.2827
	12.6491		1.41836
	15.0173		1.31777
	17.2473		1.70744
	18.6262		1.84181
	14.5248		1.26995
	14.3271		1.86953
	22.4799		1.30616
	16.268		1.26706
	15.8895		1.91575
	12.2732		1.39094
	15.8727		1.38768
	14.571		1.19315
	12.2538		1.34251
	11.5244		1.39768
	16.1368		1.70847
	15.5041		1.51158
	17.4855		1.43677
	12.8265		1.66853
	20.5019		1.28045
	17.9296		1.44764
	18.7065		1.9303
	15.4899		1.46677
	19.5485		1.49215
	15.9784		1.46284
	13.842		1.81126
	16.3651		1.34397
	11.8502		1.4625
	14.4618		1.49707
	16.3392		1.57078
	15.0406		1.48929
	22.7467		1.38499
	21.7592		1.27916
	14.9547		1.62854
	16.7782		1.40976
	14.3841		1.26466
	18.5896		1.5037
	20.6051		1.45793
	13.6677		1.77149
	13.6383		1.75363
	11.5857		1.2183
	15.4743		1.44011
	15.2719		1.8095
	14.6418		1.76196
	18.0522		1.24871
	20.5464		1.69922
	18.2512		1.90385
	18.8114		1.88836
	14.0319		1.34184
	16.6245		1.77685
	13.2572		1.93757
	14.1092		1.5881
	18.6392		1.33313
	16.5537		1.55632
	17.1243		1.99474
	14.82		2.01564
	17.8464		1.43899
	10.1959		1.44637
	13.6988		1.74783
	15.7117		1.75099
	19.9603		2.06803
	18.9521		1.80887
	13.483		2.02438
	17.0181		1.26293
	17.4217		2.0381
	18.1031		1.81399
	21.1882		1.17167
	21.6793		1.41741
	15.312		1.81661
	16.0958		2.05465
	13.4225		1.16963
	14.2477		1.25338
	19.3574		1.59143
	13.6698		1.18246
	14.8718		1.82957
	13.4424		1.77643
	15.9275		1.52014
	19.7393		2.02214
	16.3738		1.62013
	22.1411		1.21551
	15.4989		1.65221
	18.262		1.36187
	17.7143		1.40132
	17.4653		1.49738
	22.7618		2.14675
	13.7764		1.68526
	16.9145		1.31438
	14.5123		2.0933
	17.2887		1.71066
	13.1623		1.4666
	12.2611		1.80851
	15.7872		2.25911
	16.8075		1.68735
	16.8774		1.80571
	11.9189		1.40316
	12.0324		1.29566
	13.9335		1.30762
	13.2167		1.68347
	14.7488		1.53925
	27.6055		1.28071
	14.0414		1.26109
	14.8369		1.6338
	16.2508		1.94531
	13.5693		1.22057
	13.5783		2.51112
	18.8161		1.42663
	18.6582		1.34254
	14.893		1.89887
	22.7855		1.48164
	17.6759		1.36304
	20.2473		1.61983
	14.1269		1.6338
	18.5658		1.33794
	19.6504		1.67564
	21.4407		1.82406
	15.8412		1.85208
	15.9788		1.42702
	16.5473		1.36138
	15.8351		1.45691
	16.8438		1.46812
	15.1692		1.90064
	14.3833		1.4132
	14.2495		1.56637
	16.7885		1.25977
	14.9965		1.50622
	19.3979		2.5382
	18.4217		1.40993
	16.792		1.53479
	14.3966		1.59966
	14.8528		1.96078
	16.054		2.50118
	14.612		1.14714
	14.3392		1.4823
	10.7881		1.55383
	13.347		1.37419
	14.0501		1.55216
	17.1131		1.30023
	21.0173		1.40969
	10.965		1.6456
	14.142		1.12902
	20.4061		2.2604
	17.798		1.4554
	12.8032		1.6181
	11.9003		2.63044
	18.164		1.61726
	14.4027		1.9013
	20.5261		1.40202
	21.1463		1.34698
	21.6086		2.45928
	19.3004		1.62715
	11.3315		1.55448
	15.2663		1.17212
	15.8887		1.5
	14.8619		1.47944
	14.8373		1.31111
	14.3474		1.71501
	18.5533		1.5038
	15.0803		1.34106
	18.9629		1.46606
	15.7605		1.69574
	15.0652		1.23595
	12.0937		1.28788
	13.7402		1.556
	20.9952		1.38545
	17.3509		1.82759
	15.0423		1.92318
	16.6564		1.62586
	15.0781		1.45078
	21.1925		1.15874
	17.322		1.37375
	13.2085		1.16063
	19.893		1.56623
	21.4674		1.66417
	17.2408		1.9914
	15.874		1.41127
	19.8701		1.44987
	15.2085		1.30762
	12.6854		1.62274
	21.9158		2.11159
	14.7669		1.86848
	15.1213		2.64118
	15.7531		1.07227
	12.9232		1.66686
	14.1614		1.48128
	19.9197		1.99572
	17.9478		1.17285
	17.4614		1.3818
	16.9046		1.74641
	17.4359		1.26747
	17.0393		1.83198
	17.3379		1.31828
	15.5071		1.45221
	16.0889		2.36472
	19.7212		1.53307
	15.5753		1.1949
	15.7924		1.48244
	16.4014		1.308
	18.4968		1.24165
	18.9197		1.23713
	17.5373		1.35347
	14.2097		1.73307
	15.0829		2.154
	17.0259		1.856
	15.7859		1.65315
	18.161		1.33979
	11.3906		1.14519
	15.546		1.29162
	11.6901		1.27259
	13.4795		1.38951
	12.6569		1.30397
	13.0695		1.62266
	14.2231		1.67113
	14.9495		1.22307
	13.628		1.67489
	12.9711		1.70816
	14.9176		1.16563
	16.3543		1.25166
	15.5736		2.42663
	15.2456		1.29205
	20.0522		1.42244
	16.9758		1.69893
	15.6016		1.58349
	21.0798		1.6316
	29.2758		1.65952
	20.8541		1.78309
	16.9046		1.64482
	12.2404		1.59803
	19.7393		1.48463
	17.6789		1.57144
	15.9884		1.28471
	16.3966		1.63705
	16.7725		1.34612
	17.388		1.6202
	13.7497		1.45733
	16.2495		1.38241
	12.2482		1.37547
	13.2106		1.87747
	13.8947		1.34534
	14.7151		1.22812
	18.1597		1.22067
	17.4549		1.67944
	15.4825		1.45215
	16.9253		1.28291
	13.3543		1.77172
	12.0626		1.76083
	21.3712		1.68711
	19.5485		1.79538
	10.2559		1.23751
	18.473		1.15674
	16.8852		1.45546
	19.8697		1.3346
	14.4143		1.71958
	11.5287		1.41884
	20.12		2.41966
	19.6772		1.72396
	19.0073		1.85464
	12.5779		1.15107
	15.2987		1.59842
	16.7268		1.47139
	14.9426		1.59171
	14.5063		1.30067
	13.6051		1.32986
	15.5706		1.75181
	12.0237		1.32193
	15.1834		1.3516
	11.7195		1.53744
	15.2486		1.32923
	15.5714		1.84244
	13.2698		1.72925
	18.2672		1.60349
	13.7889		1.89728
	24.3759		1.67882
	14.2111		1.27878
	16.3565		1.21339
	14.0026		1.34534
	14.9719		1.34772
	19.6409		1.39373
	19.3388		1.55376
	12.0397		1.27786
	11.6936		1.1749
	16.3254		1.65524
	16.8563		2.0169
	16.6642		2.03469
	15.4575		2.23098
	16.3526		1.52601
	13.9232		1.79902
	16.8804		1.83841
	14.4135		1.62147
	13.1769		2.15915
	14.943		1.60329
	16.7195		1.35977
	13.8761		1.38634
	14.9029		1.40148
	15.5606		1.38975
	19.4165		1.21916
	17.7225		1.81997
	14.0522		1.77361
	15.7372		1.44522
	18.9888		1.48102
	15.0695		1.95882
	18.3246		1.23553
	15.1834		1.39284
	16.8507		1.24512
	17.1269		1.5553
	13.6167		1.11978
	8.65688		1.30529
	13.4661		1.44649
	16.0807		1.23673
	14.35		1.34627
	13.9741		1.92216
	16.6448		1.72625
	15.293		1.52699
	9.98274		1.58262
	17.5093		1.29293
	14.8934		1.53392
	14.4618		1.39156
	20.0458		1.38347
	19.6983		1.54739
	10.9249		1.44893
	21.893		1.61167
	17.0518		1.49014
	15.6875		1.58158
	12.4661		1.97567
	11.7065		2.11855
	16.6245		1.89122
	14.943		1.3209
	21.0794		1.2424
	14.3474		2.67832
	15.6465		2.01911
	14.4169		1.45965
	15.1903		1.73178
	16.8213		1.24801
	19.8912		1.74094
	15.4182		1.75195
	12.8977		1.42526
	13.552		1.40473
	17.7544		1.38511
	12.4342		1.56626
	14.6772		1.72089
	16.7039		1.81099
	20.9884		1.85484
	11.2128		1.892
	14.7587		2.23098
	14.2995		1.46644
	13.2728		1.77784
	18.3017		1.53992
	15.4877		1.39932
	22.953		1.90489
	14.1368		1.75841
	18.9888		1.73138
	16.0142		1.82112
	13.6552		1.58103
	12.1204		1.54082
	14.8938		1.26512
	16.2352		1.72402
	17.3112		1.93809
	17.6988		1.50428
	13.2637		1.44536
	11.8239		1.33788
	14.6314		1.10194
	17.489		1.90179
	11.1731		1.75681
	18.3133		1.78042
	13.8645		1.59081
	12.1877		1.71891
	15.9637		1.35529
	13.0207		2.33055
	15.8097		2.58044
	17.4829		1.26498
	16.8701		1.49187
	15.6081		1.63914
	14.8036		1.5017
	16.5455		1.41872
	23.1083		1.98731
	17.7695		1.44611
	8.86275		1.17163
	14.9698		1.4199
	16.0026		1.941
	18.8697		1.25303
	16.4476		1.57718
	16.8338		1.243
	11.6077		1.58465
	15.3599		1.78543
	14.328		1.55728
	12.2853		1.53726
	14.9158		1.41462
	11.9922		1.34142
	26.101		2.04686
	15.593		1.775
	19.2974		1.18414
	13.4078		1.18435
	16.8826		1.66045
	15.3448		1.93296
	13.6116		1.34747
	13.9802		1.45029
	16.4165		2.53046
	15.2175		1.58816
	15.5399		1.70466
	16.6366		1.3017
	12.344		2.5323
	12.7419		2.19267
	13.2041		1.36409
	15.7367		1.95543
	14.7212		1.91604
	19.7631		1.54854
	13.1839		1.85815
	13.9827		1.33039
	11.1455		1.47085
	16.7246		2.77883
	14.8416		1.275
	15.8217		1.54289
	13.4286		1.59274
	14.9111		1.71825
	17.2844		1.71314
	13.3915		1.9772
	16.3833		1.75783
	21.1049		1.45199
	14.9374		1.76367
	21.2197		1.47547
	15.9538		1.73429
	15.8722		2.41317
	16.8028		1.18119
	15.558		1.77112
	14.1731		2.04776
	14.2193		1.57931
	13.7147		1.63831
	15.2551		1.58897
	20.2123		2.18175
	14.331		2.08594
	22.2011		1.95495
	29.4126		1.14582
	10.0082		1.32813
	8.19551		1.44538
	14.3479		1.74207
	18.23		2.11659
	13.4467		1.36015
	12.4471		1.67262
	12.3103		1.47404
	11.8615		1.83648
	13.1662		2.37169
	15.1562		1.75722
	20.8032		1.57732
	20.4678		1.80032
	9.58826		1.61807
	16.1886		2.77001
	10.3953		1.61238
	12.4752		1.56626
	29.2693		1.2213
	15.9292		1.50071
	12.9996		1.73618
	14.0294		1.67101
	22.811		2.23204
	17.3647		1.93859
	13.5149		1.9772
	14.9232		2.00406
	15.6849		1.56488
	19.5261		1.57896
	18.2745		1.58791
	13.385		1.74992
	15.2257		1.9217
	12.9046		1.39826
	9.46957		2.11197
	12.0678		1.66137
	13.2762		1.41977
	14.5175		1.92463
	13.675		2.00483
	15.0242		1.85129
	16.6383		1.31092
	12.6767		1.40333
	14.5645		1.69495
	15.8641		1.30798
	17.0108		2.29873
	18.7855		2.14882
	13.4143		1.28488
	21.7445		1.41386
	12.8688		1.62505
	14.618		1.61735
	9.8088		1.66036
	16.2188		1.50677
	17.0449		1.42638
	13.7864		2.38941
	16.0501		1.5403
	14.6111		1.27925
	13.6422		1.39696
	12.2995		1.47404
	14.1908		1.59392
	14.9961		1.58254
	13.1347		1.40125
	18.2689		1.19888
	16.2551		1.54208
	12.9176		1.37199
	14.9167		1.8079
	12.2145		1.58476
	13.038		1.35616
	14.2594		1.4401
	15.1044		1.38979
	15.5611		1.12706
	15.0893		1.93296
	19.5701		1.16613
	13.2343		1.29032
	13.1411		1.8962
	16.2939		2.92185
	14.905		1.5072
	16.2823		1.51301
	17.7272		1.89512
	14.0578		2.03954
	16.224		1.85369
	17.1933		1.23135
	16.5727		2.97177
	12.293		1.90252
	11.877		1.43601
	14.7225		1.96162
	13.5585		1.77784
	11.7644		2.0616
	11.17		1.16179
	24.5404		2.79021
	18.1221		2.26606
	14.9543		1.32914
	11.4821		1.7306
	13.0017		1.37547
	17.1713		2.09858
	17.1778		1.31576
	13.2326		1.6435
	15.0639		1.94815
	12.0073		1.62342
	10.2706		1.49368
	17.3293		1.61411
	14.8019		1.54756
	16.4773		1.46391
	15.404		1.98629
	12.2331		1.84339
	17.1006		1.86297
	11.3712		1.55261
	15.7294		1.83198
	13.6431		2.23026
	16.0194		1.23158
	15.7514		1.38846
	12.3789		1.67053
	20.3302		1.26527
	14.7229		1.29015
	15.1455		1.54344
	17.2533		1.38565
	9.93871		2.10873
	15.9922		1.50634
	16.186		1.46532
[truncated: 1,046 more rows]
[truncated: 1,292 more columns]
