# Supplementary material for: The role of P2Y12 in the kinetics of microglial self-renewal and maturation in the adult visual cortex in vivo
Source: eLife. 2021 Jul 12;10:e61173. doi: 10.7554/eLife.61173 (PMC8341987; doi:10.7554/eLife.61173)
Supplement: Figure 3—source data 2. [file elife-61173-fig3-data2.xlsx]

## Sheet: Figure 3-Source Data 2
Figure 3-Source Data 2: Galectin 3 expression in microglia after repopulation
Figure 3-figure supplementary 1: Galectin 3 expression in doublet and singlet microglia. Representative confocal images of microglia in CX3CR1-GFP mice immunoreacted for Galectin 3 (Gal3) in fixed brain sections from mice in control conditions (A) at the peak of repopulation (Day 2) (B). (C-D) Insets of the boxed region in A-B, showing Galectin 3 positive microglia during repopulation (yellow arr…
3E	% Gal3+ Ratio to total cell count
	Control	Singlet	Doublet
	0	0.065359	0.076923
	0	0.1	0.079208
	0	0.060606	0.033333
	0.00689655	0.013793	0.041096
	0.008	0.060345	0.074766
	0	0.039773	0.013158
	0	0.150538	0.137615
	0.01	0.159574	0.082474
	0
3F	Gal3 intensity
	Doublet	2235.12	442.859	934.538	1377.37	1533.06	1186.93	713.598	304.334	1007.42	1084.18	987.394	843.935	884.359	572.885	482.085	579.742	534.094	677.619	620.256	384.106	1027.46	724.295	447.383	628.469	438.294	662.502	296.472	286.98	488.231	453.451	519.646	444.733	691.447	288.664	576.987	209.814	354.988	589.177	463.964	466.051	564.725	1245.44	749.501	620.771	460.836	498.123	487.515	268.269
	Singlet	2855.82	1680.2	1526.72	1512.21	1571.77	1728.77	1144.96	647.691	1276.2	2099.2	1657.67	562.125	1394.16	1432.16	950.547	1673.43	842.968	1089.31	1266.07	1027.16	813.864	860.657	666.359	660.11	424.168	1017.56	770.983	763.95	496.371	537.756	1295.27	497.354	488.526	720.345	540.991	726.147	95.814	510.642	264.751	1072.96	1116.48	573.04	736.165	1012.54	690.884	499.549	192.269	513.389
[truncated: 74 more columns]
