# Supplementary material for: The role of P2Y12 in the kinetics of microglial self-renewal and maturation in the adult visual cortex in vivo
Source: eLife. 2021 Jul 12;10:e61173. doi: 10.7554/eLife.61173 (PMC8341987; doi:10.7554/eLife.61173)
Supplement: Figure 4—source data 1. [file elife-61173-fig4-data1.xlsx]

## Sheet: Figure 4
Figure 4-Source data 1: Source data for microglia repopulation in mice imaged every 4 hours for 24 hours.
Figure 4: Microglia repopulation in the visual cortex demonstrates that cell division can account for the fast repopulation observed in vivo. We imaged CX3CR1-GFP mice every 4 hours for 24 hours during the peak of repopulation (day 2- day 3). We observed a range of behaviors of existing microglia: (A) no division, (B) rapid division on the time scale of 4-8 hours once the doublet appeared, and (C…
	Number of microglia
Figure 4E		Animal 1	Animal 2	Animal 3	Animal 4
	0	45	94	94	62
	4	65	97	92	63
	8	73	119	98	61
	12	76	128	109	71
	16	63	130	113	80
	20	71	131	102	90
	24	99	148	94	90
Figure 4F	3D Nearest Neighbor
	0	4	8	12	16	20	24
	46.3872	42.7629	37.6862	29.6993	25.4715	31.6429	29.8956
	32.7296	35.9249	33.5508	32.1438	33.5588	36.3164	32.1435
	43.0611	34.7956	36.3943	32.7189	28.2626	31.6006	31.6056
Figure 4G	Number of Doublet
		Animal 1	Animal 2	Animal 3	Animal 4
	0	10	3	8	4
	4	14	8	20	10
	8	12	7	22	21
	12	18	10	23	22
	16	23	10	23	20
	20	23	10	24	21
	24	26	8	21	18
Figure 4H	Doublet Division Kinetics (%) Day 2-Day 3
		Secondary Divisions				Rapid Divisions
	0	0	0	0	0	0	0	0	0
	4	0	0	0	0	0	4.7619	0	2.06186
	8	0	1.63934	1.02041	0	4.10959	4.91803	1	5.04202
	12	3.94737	1.40845	0.91743	0	3.94737	7.04225	3	3.90625
	16	6.34921	1.25	0.88496	0	3.1746	10	5	3.84615
	20	8.4507	2.22222	1.96078	0.76336	4.22535	10	7	5.34351
	24	8.08081	2.22222	3.19149	0.67568	3.0303	7.77778	9	3.37838
Figure 4I	Translocation Index
	0 to 4hrs	7.82352	8.23285	14.3445
	4 to 8hrs	8.37808	8.22551	9.51523
	8 to 12hrs	6.03728	6.19234	3.84854
	12 to 16hrs	7.40966	9.25772	8.543
	16 to 20hrs	8.56888	10.7125	10.682
	20 to 24hrs	6.23802	6.58997	11.1366
Figure 4J	Number of Microglia
		<10μm				10-20μm				20-30μm				>30μm
	0 to 4hrs	24	19	21		6	10	13		1	0	0		1	0	0
	4 to 8hrs	28	25	31		11	9	11		0	0	0		0	1	0
	8 to 12hrs	30	27	29		5	8	6		0	0	0		1	0	0
	12 to 16hrs	27	27	19		12	4	20		0	2	0		2	1	0
	16 to 20hrs	27	27	24		7	12	19		2	1	0		0	1	0
	20 to 24hrs	20	24	31		14	7	13		3	1	0		4	0	0
Figure 4K	Pie chart
		second Analysis	total microglia in last time point	% of microglia in last time point
	persistent microglia	1	41	2.439
	persistent doublet	2	41	4.878
	doublet	29	41	70.73
	newly born microglia	9	41	21.95
	secondary divisions	1	41	2.439
	division	8	41	19.51
