# Supplementary material for: The role of P2Y12 in the kinetics of microglial self-renewal and maturation in the adult visual cortex in vivo
Source: eLife. 2021 Jul 12;10:e61173. doi: 10.7554/eLife.61173 (PMC8341987; doi:10.7554/eLife.61173)
Supplement: Figure 5—source data 1. [file elife-61173-fig5-data1.xlsx]

## Sheet: Figure 5
Figure 5-Source data 1: Source data for the mathematical modeling of microglial repopulation.
Figure 5: Mathematical Modeling of microglial repopulation. (A-C) Mathematical modeling of microglial repopulation using measured kinetic parameters. Empirical rvalues from the simulation are plotted for a minimum 4-hour delay (A) and 8-hour delay (B) between subsequent divisions; each animal is represented by a line (n=10).
Figure 5A	1	0.9	0.8	0.7	0.6	0.5	0.4	0.3	0.2	0.1
8hour	1	1	1	1	1	1	1	1	1	0.923466
	1	1	1	1	1	1	1	1	1	0.996258
	1	1	1	1	1	1	0.999998	0.999616	0.950386	0.224448
	1	1	1	1	1	1	0.997962	0.84026	0.082426	0
	1	1	1	1	1	1	1	1	1	0.984184
	1	1	1	1	1	1	1	1	0.99999	0.935748
	1	1	1	1	0.999998	0.999962	0.99678	0.898634	0.282044	0.000592
	1	1	1	1	1	0.999774	0.980404	0.614078	0.02433	0
	1	1	1	1	1	1	1	1	0.999984	0.985028
Figure 5B
8hour	1	0.9	0.8	0.7	0.6	0.5	0.4	0.3	0.2	0.1
	1	1	1	1	1	1	1	1	0.99662	0.35483
	1	1	1	1	1	1	1	1	0.99995	0.90892
	1	1	0.99999	1	0.99991	0.99912	0.98892	0.89062	0.44631	0.01679
	0.99911	0.99593	0.98291	0.92835	0.75552	0.40053	0.07942	0.00241	0	0
	1	1	1	1	1	1	1	1	0.99971	0.67581
	1	1	1	1	1	1	1	0.99996	0.99418	0.5737
	0.99889	0.99653	0.98885	0.96329	0.88298	0.67696	0.3324	0.06018	0.00129	0
	0.98632	0.95901	0.88581	0.71529	0.43151	0.13968	0.01443	0.00027	0	0
	1	1	1	1	1	1	1	0.99998	0.99855	0.90925
