# Supplementary material for: The role of P2Y12 in the kinetics of microglial self-renewal and maturation in the adult visual cortex in vivo
Source: eLife. 2021 Jul 12;10:e61173. doi: 10.7554/eLife.61173 (PMC8341987; doi:10.7554/eLife.61173)
Supplement: Figure 6—source data 1. [file elife-61173-fig6-data1.xlsx]

## Sheet: Figure 6
Figure 6-Source Data 1: Source data for the morphology and soma area of Newly-born microglia
Figure 6: Newly-born microglia remain in a hyperramified state after repopulation (A) Individual microglia imaged in CX3CR1-GFP and P2Y12-KO mice during control, depletion (7 days of PLX), and repopulation (7 and 30 days). (B) Sholl profiles summarizing the morphology of microglia during depletion and repopulation. (C) Microglia have an increased number of maximum intersections in the later time …
Figure 6B	Distance from the Soma	Control														7 Day PLX							1 day repopulation				2 day repopulation				3 day repopulation							5 day repopulation				7 Day repopulation
	0	1	2.33333	2	6	2	2	2.5	3	3.5	2.5	3.5	3	4		4.66667	2.5	3.66667	3.5	3	2.66667		1	2.66667			2.33333	1	1		3.5	3.33333	4.33333	3.25	2.5	1.5		5	6.66667	4		2	2	2.33333	3.75	4.5	2
	2.5	6.66667	4	8	10	7.75	6	5.75	6	4.5	5.75	4.25	5.25	6.75		9.66667	8.25	9.33333	6.5	8.33333	9.33333		8.5	7.33333			4	8.66667	5.75		8	8	9	6.25	5.25	5.75		9	10.6667	7.66667		7	5.66667	9.33333	5.75	6.25	4.75
	5	8.33333	5.33333	9	11	7.75	6	6.5	6.75	4.75	5.5	5	7.25	6		10.3333	9.75	10.6667	8	8	10		9	8.33333			7	10	7		9.5	9.66667	10.6667	6.75	6.25	8.25		9.33333	13.6667	11		9.5	8.66667	11	6	6.75	6.25
	7.5	8.66667	6	9	12.3333	9.75	7.25	6.75	7.25	6.25	6.75	5.75	8.75	7.25		12.3333	9.75	8.33333	10	9	11.3333		11	9			7	11	8.5		8.5	12.3333	11	6.25	6.75	7		13	17.3333	11.3333		9	12.6667	11.6667	6.75	8	8.5
	10	9.66667	6	9.5	12.6667	10.75	8.75	8.5	7.75	6.25	7.75	6	9.5	8.5		13	10.5	8	10	8.33333	10.3333		12.5	10			7.66667	10.3333	8		10.5	10.6667	12.6667	7.25	8.75	8.5		13.6667	20.6667	11.3333		14	13	14	7.75	8.75	7.75
	12.5	9.33333	7	8.5	11.6667	13.25	8.5	8.25	8.25	6.5	7.75	7.25	9	7.75		15	10.25	8.33333	9.5	6	9.66667		10	11.6667			9	10.6667	8.25		12	9.33333	13	7.25	8.5	7.25		13.6667	17.6667	12.3333		13.5	15	16	8.5	8.75	8.75
	15	8	6.66667	9.5	13.6667	12.25	7.5	9.25	8.25	5	7	7.25	7	6.5		13.3333	8.25	8.33333	9	7	7.66667		13	10			7.66667	11	7.75		11	9.33333	12.6667	6.75	8.5	7.75		15	19	15.6667		12.5	15	14.6667	8.25	9	8
	17.5	8.66667	6.66667	8.5	12.6667	9.25	6	8.75	7.25	4.25	6	6.5	7.25	5.75		12.3333	8.5	8.33333	11	5.66667	3.66667		11.5	9.33333			7.66667	9.33333	7.25		9	9.66667	13	6.5	8.5	6.25		14	17.6667	15		14	14.6667	14	9	9.75	7.25
	20	7.66667	8.33333	9.5	10.6667	8.5	5	8.25	4.5	4	5.5	5.5	5.5	4.5		10.6667	8.75	7	8.5	6	4		10	10			11	8	4.5		5	9.66667	12.6667	5.25	6.75	5.5		13	15.6667	11.6667		16.5	13.6667	10.3333	7	9	6.75
	22.5	4.66667	7.33333	10	8.66667	6.25	3.25	5.75	4	2.25	3.75	4.75	4.5	3.5		8.66667	8	7.33333	6.5	5.33333	5		10.5	8.33333			9.66667	6	3.5		7	10	10.6667	3.75	4.5	4.75		14	12.6667	9.66667		20.5	14.6667	9.66667	6	7.5	5
	25	3.66667	6.66667	7.5	7	4.25	2	3.75	3	0.75	3.25	3.5	3	2.75		5	6.75	7.66667	3	4.66667	3.66667		10	7.66667			10.6667	5.66667	2.25		5	11	10	2.25	2.5	3.25		10	11.3333	10.3333		15.5	11.6667	5.66667	4.5	5.5	3.75
	27.5	3.33333	4.66667	4.5	5	4.25	0.5	3.75	1.75	0.75	2.5	2.5	2.75	1.5		4.33333	5.5	7.33333	2	4.66667	2.33333		10	5.33333			12.3333	5.66667	1.25		4	7.33333	8	1.75	2	1.75		8.33333	8.33333	12.3333		12	8.66667	5.33333	3.75	4.25	2
	30	2	4.33333	4.5	5.66667	3.25	0.25	3	0.75	0	2.75	2.5	1	0.25		2.33333	4.75	7	2.5	5	2.33333		10	4.33333			11	4	1.5		3	7	7	1	0.75	1.66667		6.66667	5.66667	10.6667		7.5	6.66667	3.33333	3.25	3.25	1.75
	32.5	0.333333	3.33333	4	3.33333	4.25	0	2	0.25	0	1.25	1.5	0.25	0		1.66667	5.25	4	0.5	3.33333	0.666667		7	4			12.6667	3.33333	1.25		1	4.66667	8	1	0.5	0.5		6	6	6.66667		5.5	5.66667	2	2.25	2.5	1.25
	35	0.333333	1.66667	4	2.66667	3	0	1	0.25	0	1	0.25	0	0		1	3.75	4	0	3.66667	0.333333		6	3			9	2.33333	0.75			7	4.5	0.5	0.25	0		5.33333	6.66667	5.33333		5.5	4.66667	1.33333	0.75	0.5	0.25
	37.5	0.333333	1.33333	2.5	0.666667	2.25	0	0.25	0	0	0.666667	0	0	0		1.33333	2	2.33333	0	4.33333	0		3	1			7	2	1			8	2	0.25	0	0		2.66667	4	5.66667		5	1	1	1	0	0.25
	40	0.333333	1.33333	1.5	0.333333	0.75	0	0	0	0	0.666667	0	0	0		1.33333	0.25	1.33333	0	4	0		1	1			6.33333	0.666667	0			8	2	0.333333	0	0		3.66667	5	5		4.5	0.333333	0	0.666667	0	0.25
	42.5	0.333333	1.33333	0.5	0	1	0	0	0	0	0.333333	0	0	0		0.666667	0.25	1	0	3	0			1			8.33333	0.333333	0			4.5	2	0	0			2.66667	4	4.66667		2.5	2	0	0	0	0.25
	45	0.333333	1	0	0	0.75	0	0	0		0	0	0			0.333333	0.25	1.33333	0	3.33333	0						3.66667	0.333333	0			5		0				4	1	3.33333		0.5	0.666667	0	0	0	0
	47.5	0.333333	0	0	0	0		0	0		0	0	0			0.333333	0.25	1	0	3.66667	0						4	0	0			3.5		0				2	2	5		0.5	0	0	0	0	0
	50	0.333333	0	0	0	0		0			0	0	0			0.333333	0.5	1	0	2	0						4.33333	0	0			2		0				1	1	5		0.5	0	0	0	0	0
	52.5	0.333333	0	0	0	0		0								0.333333	0.5	0.666667	0	1.33333	0						3.66667	0	0			1		0						3		0	0	0		0	0
	55	0	0	0	0	0		0								0	0.25	0.333333	0	0.666667	0						2.33333	0	0			1								3		0	0	0		0	0
	57.5	0	0	0	0	0										0	0	0.333333	0	1.66667	0						1.66667	0	0			1								1		0	0	0		0
	60	0	0	0	0	0										0	0	0	0	1	0						1.66667	0	0			1								1		0	0	0
	62.5	0	0	0	0	0										0	0	0	0	1	0						1	0	0											1		0	0	0
	65	0	0	0	0	0										0	0	0	0	1.33333	0						0	0	0											1		0	0	0
	67.5	0	0	0	0	0										0	0	0	0	1	0						0	0	0													0	0	0
	70	0	0	0	0	0										0	0	0	0	0.666667	0						0	0	0													0	0	0
	72.5	0	0	0	0	0										0	0	0	0	0.333333	0						0	0	0													0	0	0
Figure 6C	Maximum Intersections CX3CR1-GFP
	Control	PLX	D1	D2	D3	D5	D7	D14	D21	D30
	9.66667	15	13	12.6667	12	15	20.5	12.6667	18.3333	15.6667
	8.33333	10.5	11.6667	11	12.3333	20.6667	15	14.6667	16.3333	15.5
	10	10.6667		8.5	13	15.6667	16		16	13.5
	13.6667	11			7.25		9		14.6667	17.3333
	13.25	9			8.75		9.75		11.6667	18.5
	8.75	11.3333			8.5		8.75
	9.25
	8.25
	6.5
	7.75
	7.25
	9.5
	8.5
Figure 6D	Area under the Curve CX3CR1-GFP
	Control	PLX	D1	D2	D3	D5	D7	D14	D21	D30
	275.6	329.6	357.5	427.5	236.9	422.5	441.9	289.2	546.7	304.2
	210	313.8	280.4	274.6	404.6	507.1	387.5	438.3	341.3	374.7
	210.4	310.4		172.5	375	477.9	326.3		422.5	277
	278.8	221.9			165.8		343.8		320.6	464.4
	327.5	335.8			180.6		212.3		252.9	440
	210	234.2			174.2		235.6			351.7
	172.5						186.9
	121.9
	176.7
	165
	185
	162.5
Figure 6E	Full Width Hallf Max CX3CR1-GFP
	Control	PLX	D1	D2	D3	D5	D7	D14	D21	D30
	6.62069	7.33333	6.15385	10.2632	5.33333	6.66667	4.97561	8.36842	6.54545	4.21277
	11.52	10.8571	7.2	8.72727	9.72973	4.83871	6.26667	6.81818	4.65306	5.80645
	9	11.0625		9.41176	6.46154	8.42553	5		7.5	5.92593
	6.14634	6.36364			11.5862		9.33333		5.45455	4.96154
	7.09434	16			8.45714		7.58974		6.85714	4.64865
	7.31429	6.70588			7.76471		10.2857
	8.64865
	8.9697
	9.23077
	11.6129
	10.2069
	6.94737
	7.52941
Figure 6F	Soma Area CX3CR1-GFP
	CTL	PLX	1D-2D	3D	5D	7D	21D	30D
	33.9059	46.8705	92.988	38.0843	55.6492	34.4353	53.1469	43.0442
	40.844	88.6868	82.6173	71.6872	58.3396	52.8099	33.7703	50.1118
	41.6412	44.0766	57.95	47.6196	45.7224	39.1269	52.9792	40.5252
	32.2987	45.2506	52.3117	44.5425	51.3978	48.3449	82.313	43.4648
	44.1123	72.8457	69.725	53.1379		43.1238
	49.7362	47.933	57.6313	50.9485		47.461
	41.2835	66.596	71.4373	50.9485		52.1775
		40.27
		62.4618
Figure 6G	Distance from the Soma
		Control											PLX							1D repopulation			D2-D3 repopulation						D14-D21 repopulation						D30-35 repopulation
	0	4	3.75	3.5	2.5	1.75	4.5	0.75	1.5	3.75	2.75		2.5	1.25	1.5	1.5	2.5	2.75		1	1.25		2	2.25	1.25	0.75	1.75		2.25	2	0.25	3	3.75		2	2	3	2	2.25
	2.5	5.5	5.5	4.75	6	5	5.75	5.75	6.5	5.25	5.25		4.25	5.75	6.25	6	6.25	5.75		6.4	6.5		6.25	5.5	4.25	6.75	6.5		5.5	6.25	4.75	5.75	5.75		6.25	5.25	6.25	5.5	5.5
	5	6.25	6.5	6.25	6.25	7	6.75	5.75	6.25	6.25	6.25		6.5	7.5	7.5	6.75	6.5	5.75		7.6	8.75		6.5	7	5	7.5	6		6	7.25	4.25	6.75	6.5		6.5	5.75	6.5	6.5	6
	7.5	7.5	8.25	7.25	7.75	7.75	8.25	7.75	7	7	7		6.5	7.25	7.75	8	8.25	5.75		7	9.25		7.75	8.5	7	7.75	6.5		6.5	7.25	6.25	7.25	8		7.75	6.75	8.25	7.75	7.75
	10	8	9	7.75	9.5	9.75	7.25	7.25	7.5	7.25	7.25		6.75	8.5	9	8.25	9.25	6.75		8.4	10		8.25	8.25	7.75	8.25	6.5		6.75	7.75	6.5	9	8.5		8.25	8.25	8.25	9	8.75
	12.5	8	9.25	8.25	9.75	8.75	7.5	6.5	8	8	7		6.5	7.5	8.5	9.25	9.5	7		8.2	10.5		8.5	7.25	7.25	8.5	7		9.25	7.25	8	9.75	8.75		8.5	8.25	7.5	8.25	8.25
	15	8.25	8.5	7	9.25	9.25	7.25	8	8.75	8.75	5.75		7	5.25	8.5	8.5	7	6.25		7.4	9.25		7.5	6	7.5	7.75	6.5		8.5	7.5	7.25	8.25	9.25		7.5	7.75	6.5	7.75	7.75
	17.5	6.5	7	5.25	8.75	8	6.25	6.5	7.5	9	2.5		6	4	6.25	8.25	5.75	3.5		5.8	8.25		6.5	5.75	6	7.5	5.75		9	6.5	8	6.75	9.25		6.5	8.5	6.25	8.75	6.75
	20	5.25	4.5	3	5	7	3.75	4.75	5.5	7	1.5		5.25	3.75	5.5	6.5	5.75	2		5.4	6.25		5.25	4.25	4.5	5.5	4.5		8	5.75	7	6.25	7.75		5.25	8.5	5	8.25	6.25
	22.5	3.5	3	1	3.5	6.25	3	5.5	3.25	5.75	0.5		4.75	3.25	4.5	3.75	4.5	1		4.2	5.5		4	3.5	5	4.75	4.5		5.75	6.25	5	4.75	4.75		4	6	4	6	4.5
	25	3.5	1.25	0	2.75	5	2	4.5	3	3.25	0.25		4	2.25	4.75	2.5	4.5	0.5		3	3		2.75	3.25	3.75	4.5	3.25		3.5	5	4.5	3	4		2.75	4.25	3	3	3
	27.5	1.5	0.25	0	1.5	2.75	0.5	3.5	1.75	1.75	0		3	1	3.5	1	4	0.25		2.2	2.5		2	2.5	2.75	3.5	2.25		1.75	4	3.75	2	2.75		2	3.5	2.5	2.5	2.75
	30	0.75	0.75	0	1.75	2	0.25	2.25	1.25	1	0		1.75	1	2.75	0.25	3	0		1.8	2		0.75	2.75	2.75	2.5	1		0.75	3.5	4	1	1.75		0.75	2.25	1.5	1	1.5
	32.5	0	0.5	0	0.25	1.25	0.5	1.5	0.75	0	0		1.5	0.5	1.5	0.25	2.25	0		1.6	1.5		0.75	2.75	2.25	2.25	0.5		0.25	2.5	4.25	0.75	0.5		0.75	1.25	1.25	0.25	1.25
	35	0	0	0	0	1.25	0.5	0.5	0	0	0		1.25	0.25	0.5	0.25	1.5	0		1.6	1.5		0	1.75	1	2	0.25		0.25	1.5	2	0	0		0	0.75	1	0	0.75
	37.5	0	0	0	0	0.75	0	0.25	0	0	0		1	0.25	0.5	0	0.25	0		0.8	0.75		0	2.66667	0.25	1.66667	0		0	1.25	2	0	0		0	0.25	1	0	0.5
	40	0	0	0	0	0.25	0	0	0	0			1.33333	0	0.5	0	0	0		0.8	0.5		0	1.66667	0.25	1	0		0	0.75	1.25	0	0		0	0.25	0.25	0	0
	42.5	0	0	0	0	0		0	0	0			1	0	0	0	0	0		0.2	0.25		0	1	0.25	1	0		0	0.5	1	0	0		0	0	0.666667	0	0
	45	0			0	0		0	0	0			1	0	0	0	0			0.25	0.333333		0	0.333333	0	0	0		0	0.25	0.5	0	0		0	0	0.5	0	0
	47.5	0			0	0		0	0	0			0.333333	0	0	0	0			0	0		0	0	0	0	0		0	0	0.25	0	0		0	0	0.5	0	0
	50					0		0	0	0			0	0	0	0	0			0	0		0	0	0	0	0		0	0	0.25		0		0	0	0.5	0	0
	52.5					0		0					0		0		0			0	0		0	0	0	0			0	0	0.333333				0	0	0	0	0
	55												0		0					0	0			0	0	0				0	0.333333							0	0
	57.5												0							0	0			0	0	0				0	0								0
	60												0							0	0			0	0					0	0
	62.5																							0	0					0	0
	65																							0						0	0
	67.5
	70
	72.5
Figure 6H	Maximum Intersections P2Y12KO
	Control	PLX	D1	D2-D3	D14-21	D30
	8.25	7	8.4	8.5	9.25	8.5
	9.25	8.5	10.5	8.5	7.75	8.5
	8.25	9		7.75	8	8.25
	9.75	9.25		8.5	9.75	9
	9.75	9.5		7	9.25	8.75
	8.25	7
	8
	8.75
	9
	7.25
Figure 6I	Area under the Curve P2Y12KO
	Control	PLX	D1	D2-D3	D14-21	D30
	171.3	118.1	184.1	171.9	185	171.9
	170	201.9	219.6	192.3	207.5	198.8
	135	177.5		171.9	204.2	185.4
	186.3	198.1		208.5	185.6	191.3
	209.4	148.1		156.9	203.1	183.8
	160	180.4
	157.5
	177.5
	171.3
	185
	115
Figure 6J	Full Width Hallf Max P2Y12KO
	Control	PLX	D1	D2-D3	D14-21	D30
	7.75758	14	11.4286	8	7.78378	8
	7.35135	9.41176	9.14286	11.0588	12.129	9.88235
	6.06061	9.33333		11.3548	14.25	12.6061
	6.97436	8.21622		10.5882	7.17949	7.55556
	8.61538	8.21053		10.5714	7.35135	9.14286
	9.69697	8.57143
	10
	7.77143
	7.11111
	7.44828
Figure 6K	Soma Area P2Y12KO
	Control	PLX	D1-D2	D14-D21	D30
	53.915	118.072	140.059	134.679	39.2575
	36.7777	70.6105	107.433	45.4573	53.174
	43.5723	69.2485	121.161	46.83	60.6687
	61.112	57.2925	132.32	46.0064	48.192
	80.508		191.937
	46.166		94.9998
	64.367
	53.273
	52.443
	46.011
