# Supplementary material for: The role of P2Y12 in the kinetics of microglial self-renewal and maturation in the adult visual cortex in vivo
Source: eLife. 2021 Jul 12;10:e61173. doi: 10.7554/eLife.61173 (PMC8341987; doi:10.7554/eLife.61173)
Supplement: Figure 7—source data 1. [file elife-61173-fig7-data1.xlsx]

## Sheet: Figure 7-source data 1
Figure 7-Source data 1: Source data for Newly-born microglia motility, surveillance during depletion and repopulation
Figure 7: Newly-born microglia are dynamic and survey the brain (A) Example of motility analysis showing the original microglia image, (B) Thresholded microglia (C) and a visual representation of microglial motility whereby thresholded imaged from two time points are combined with magenta representing retraction, green representing extension and white representing stable pixels. (D) Quantificatio…
	Figure 7D												Figure 7G
		CTL	3DPLX	7DPLX	1D-2D	3D	5D	7D	21D	30D				CTL	PLX	D1-D2	D14-21	D30
		0.79	0.57	0.4	0.58	0.72	1.17	0.71	1.02	0.8				0.73	0.53	0.35	0.59	0.35
		0.63	0.31	0.7	0.46	0.67	0.73	0.75	0.68	1.16				0.58	1.07	0.36	0.51	0.64
		0.67	0.59	0.48	0.58	0.76	0.66	0.86	0.71	1.17				0.75	0.38	0.46	0.62
		0.86	0.65	0.52	0.96	0.67	0.84	0.84	0.57	0.6				0.55	0.59	1.02	1.38	0.62
		0.9		0.85	0.84	0.74		0.73	0.63	0.81				0.61	0.57	0.53	0.78	0.97
		0.72		0.48		0.66		0.83						0.64	0.64	0.42
		0.91		0.52		0.45		0.66						0.98
		0.88				0.53		0.57						0.66
		0.72				0.54		0.69						0.68
		0.74				0.65		0.65
		0.6						0.53
		0.68						0.71
		0.83						0.76
		0.95						0.42
		0.83											Figure 7H
		0.53												CTL	PLX	D1-D2	D14-21	D30
		0.71												0.2	0.18	0.22	0.31	0.25
		0.68												0.16	0.16	0.12	0.19	0.19
		0.52												0.18	0.18	0.1	0.13
		0.61												0.16	0.14	0.12	0.18	0.19
		0.73												0.17	0.24	0.14	0.2	0.12
		0.65												0.2		0.2
														0.22
														0.18
														0.19
	Figure 7E
		CTL	3DPLX	7DPLX	1D-2D	3D	5D	7D	21D	30D
		0.26	0.21	0.17	0.21	0.26	0.32	0.22	0.32	0.24			Figure 7I
		0.19	0.11	0.23	0.19	0.36	0.32	0.26	0.24	0.32				CTL	PLX	D1-D2	D14-21	D30
		0.24	0.195	0.22	0.19	0.23	0.21	0.28	0.25	0.24				0.58	0.49	0.78	0.49	0.57
		0.29		0.18	0.31	0.24	0.31	0.26	0.19	0.25				0.53	0.51	0.51	0.56	0.54
		0.28		0.22	0.23	0.22		0.24	0.23	0.28				0.42	0.58	0.57	0.48
		0.22		0.18		0.25		0.24						0.55	0.52	0.58	0.56	0.57
		0.28		0.2		0.25		0.25						0.54	0.56	0.46	0.47	0.55
		0.25				0.18		0.22						0.54		0.46
		0.29				0.2		0.24						0.52
		0.2				0.17		0.19						0.47
		0.2				0.18		0.18
		0.21						0.17
		0.29						0.13
		0.26
		0.2
		0.21
		0.19
		0.17
		0.16
		0.21
		0.19
	Figure 7F
		CTL	3DPLX	7DPLX	1D-2D	3D	5D	7D	21D	30D
		0.79	0.84	0.87	0.74	0.71	0.55	0.61	0.6	0.63
		0.63	0.75	0.6	0.88	0.62	0.6	0.7	0.71	0.55
		0.74	0.65	0.98	0.72	0.65	1	0.66	0.67	0.46
		0.71		0.78	0.58	0.6	0.78	0.61	0.75	0.88
		0.65		0.6	0.56	0.63		0.63	0.78	0.67
		0.62		0.75		0.68		0.55
		0.59		0.78		0.64		0.74
		0.57				0.73		0.74
		0.86				0.78		0.68
		0.59				0.58		0.84
		0.69				0.51		0.45
		0.56						0.47
		0.6						0.58
		0.62
		0.78
		0.58
		0.47
		0.6
		0.56
		0.51
		0.53
	Figure 7K									Figure 7L
		Control	PLX	D1-D2	D3	D5	D7	D21	D30		CTL	PLX	D1-D2	D3	D5	D7	D21	D30
		0.747902	0.253198	0.528238	0.682302	0.837275	0.596621	0.690877	0.77275		1.56657	1.72662	1.74053	1.55556	1.71716	1.39058	1.23422	1.54698
		0.617923	0.421398	0.609287	0.722144	0.70661	0.74156	0.702758	0.638075		1.7322	1.26532	1.46771	1.68041	1.41575	1.65893	1.44301	1.58645
		0.619296	0.429754	0.339679	0.691052	0.631046	0.743525	0.724929	0.649306		1.47007	1.79463	1.66475	1.73508	1.38015	1.33293	1.70702	1.73516
		0.828248	0.352621	0.320983	0.623637	0.642973	0.712642	0.704223	0.437556		1.40526	1.51323			1.57205	1.73075	1.51396	1.52129
		0.730642	0.293217	0.504194	0.64855		0.758281	0.568965	0.810369		1.48102	1.29495				1.89476	1.5964
		0.824704	0.196573	0.398317	0.640315		0.645804				1.71623					1.89694
		0.581575	0.0995021	0.291765			0.632477				1.32781					1.57409
		0.515848	0.172867				0.778621				1.38361					1.33472
		0.559462	0.260104				0.68029				1.44998
		0.532302									1.53324
		0.577227									1.31966
		0.742746									1.50421
		0.68849									1.32516
		0.90279
		0.838852
		0.628487
		0.616321
	Figure 7M							Figure 7N
		Control	PLX	D1-D3	D30				CTL	PLX	D1-D3	D30
		0.683712	0.104285	0.58206	0.79131				1.36842	2.49611	1.39731	2.49964
		0.813356	0.220456	0.427469	0.79456				1.59368	1.59155	1.52821	1.46286
		0.797	0.12674	0.345313	0.75005				1.51645	2.3435	1.46337	1.64531
		0.795646	0.199244	0.596325					1.27572	3.26975	1.74777
		0.686367	0.17149	0.690077					1.55445	1.64124	1.4669
		0.693519	0.173577	0.431492					1.48481	2.77049	1.14905
		0.77334		0.716633					1.59277		1.25892
		0.796227		0.388675
