# Supplementary material for: The role of P2Y12 in the kinetics of microglial self-renewal and maturation in the adult visual cortex in vivo
Source: eLife. 2021 Jul 12;10:e61173. doi: 10.7554/eLife.61173 (PMC8341987; doi:10.7554/eLife.61173)
Supplement: Figure 8—source data 1. [file elife-61173-fig8-data1.xlsx]

## Sheet: Figure 8
Figure 8-Source data 1: Source data for newly-born microglia response to acute laser ablation injury.
Figure 8: Newly-born microglia respond robustly to acute laser ablation injury. Example microglial response to focal laser ablation at t=0 min, t=30min and t=55 min after ablation for control (A), 3 days of repopulation (B), 7 days of repopulation (C), and 30 days of repopulation (D). (E) Quiver plot of microglial response. Green arrows correspond to vectors moving towards the core and red arrows…
Figure 8F	Average of all the vectors towards the core
	CONTROL													3DPLX													3D													7D-8D
	11209	5533.22	76953.1	-24968.6	172499	96563.2	49110.2	903.571	18067.4	16097.9	6466.55	89031	162780	-67403.2	101513												102527	20475.4	122935	-16338.2	-76966.8	-39810.9								34423.8	65237.5	50978.8	-47381.7	255960	110594	-12725.4
	-330010	-338391	-25215.3	-395172	-271171	-219222	83446.1	66578.7	-126402	-87162.8	-275535	67036.5	-232701	486204	45771.7												93883.2	33106.1	58140.7	-570863	-44686.7	469633								-587767	171530	221119	-594299	-15173.8	86845.3	-93265.7
	-150010	175733	365376	-311606	13219.8	153813	102766	201682	-64169.7	104378	39767	87711.1	61993.6	385215	65024												346416	345636	258468	-39381.7	77546.5	175078								3732.84	218074	328751	180308	200051	146785	-96675.7
	186081	528425	497227	-109824	213145	289206	85318.1	202840	14230.4	136750	155855	86998	212193	512525	28671.1												335576	543483	597659	316028	16632.8	205317								371194	263639	311366	442144	292597	44763.8	-116111
	304200	569804	380296	69547.3	304989	376208	81548.1	211457	39433.6	120121	132775	101909	239715	311247	36210.5												222803	394337	472060	328410	39242.8	168864								418152	341365	244104	555504	310889	76552.2	-108425
	485644	518933	310888	148320	270510	512815	70155.3	271369	50419.1	115040	133904	146784	214300	357664	48195.8												298256	271695	368333	319933	24044.9	274309								325930	98943.1	294521	468220	155682	81415.9	-71509.1
	538283	388676	221438	109012	169915	466237	97138.5	357121	62302.6	69331.9	104198	134105	100315	98170	28686.1												273610	299756	280990	279876	18663.7	310595								217705	145746	197683	435878	126165	76307	13416.6
	529532	331739	174793	145966	142238	341142	61130.9	312219	39456.7	38548	82966.1	67642.9	163436	143372	18879.8												264560	304064	247999	271907	31021.3	248110								211499	163644	205492	177882	122254	90793.7	45019.9
	446162	336237	159322	84660.2	101100	237363	43758.8	173856	60444	56928.1	41697.5	43841.3	120513	58844.5	15874.7												207465	246523	200493	205165	13598.2	279930								177935	152063	190010	285269	93603	97293.9	66298.5
	324211	170145	132538	102465	88872.3	239343	49221.2	250488	30493.2	41565.8	29943.1	35188.5	78687.7	88773.5	53761.8												264705	185280	212965	205287	5369.76	218090								210755	102351	210774	257976	120898	137382	76939.5
	222902	98079.1	134788	131974	81791.5	217628	53176.6	229140	47224.2	32837	26756.6	82334.5	90142.4	86787.9	18674												265575	219216	192451	188730	24914.7	93917.8								184933	86049.1	143440	152814	134379	47187.8	74921.9
	165554	151124	121750	113904	43955.2	198282	69252	52467.3	30893.2	54299.2	9958.3	39577.6	71794.8	8528.91	-26617.8												66163.1	235542	189146	170088	151161	108916								164725	141351	208548	162940	144984	37734.6	77570.5
Figure 8I	Convergence		CONTROL												PLX				3D									7-8D								30-31D
	625.907	436.97	798.956	2173.91	751.967	1731.89	1118.96	8004.72	1159.96	671.977	910.948	811.95	200.965		1432.95	673.934	3630.83		3083.91	6782.93	2094.97	14099.9	357.955	2672.6	8663.94	44.9639		431.972	11418.9	2094.97	167.963	408.989	2935.98	1071.9		2409.9	3918.9	119.965	1976.95	307.947
	635.907	969.97	1284.96	2090.91	1443.97	2023.89	2166.96	8862.72	881.96	1108.98	1141.95	928.95	588.965		1259.95	627.934	2798.83		6212.91	12196.9	6583.97	16286.9	346.955	6395.6	9237.94	51.9639		310.972	15902.9	6583.97	206.963	785.989	4647.98	915.898		3882.9	6486.9	80.9652	2648.95	277.947
	653.907	1980.97	3786.96	2113.91	2410.97	3710.89	5524.96	10015.7	739.96	1406.98	1609.95	2117.95	1550.96		1391.95	1309.93	2293.83		7635.91	11965.9	11744	16535.9	336.955	5667.6	9418.94	103.964		891.972	16671.9	11744	242.963	3074.99	5467.98	783.898		6534.9	10309.9	38.9652	2011.95	291.947
	816.907	4866.97	6487.96	2006.91	4522.97	7571.89	5774.96	10653.7	760.96	1952.98	2511.95	3678.95	3073.96		1673.95	2718.93	2113.83		8393.91	12158.9	12141	14260.9	424.955	5992.6	9799.94	148.964		1700.97	17305.9	12141	337.963	6544.99	5990.98	638.898		10060.9	13675.9	81.9652	1720.95	341.947
	866.907	8780.97	7090.96	2237.91	6778.97	10122.9	4696.96	11823.7	627.96	2788.98	4110.95	5362.95	4731.96		1833.95	4625.93	1959.83		9372.91	13018.9	12337	14061.9	1836.95	6316.6	9955.94	412.964		3013.97	17793.9	12337	1055.96	7736.99	6291.98	484.898		12169.9	15818.9	362.965	1625.95	933.947
	896.907	10919	6982.96	2618.91	7268.97	10045.9	4820.96	13308.7	584.96	3321.98	5042.95	6396.95	5554.96		1739.95	4765.93	1946.83		10221.9	13808.9	14964	15150.9	3872.95	6596.6	9901.94	749.964		4648.97	17958.9	14964	1980.96	9114.99	6800.98	441.898		12967.9	15201.9	2321.97	1806.95	2214.95
	1077.91	11209	6785.96	2719.91	7944.97	9765.89	4761.96	14807.7	648.96	4541.98	5365.95	5712.95	6116.96		1618.95	5406.93	1757.83		11801.9	14092.9	17636	15194.9	5006.95	6781.6	9990.94	1069.96		6289.97	18491.9	17636	3576.96	9351.99	7588.98	488.898		12009.9	14139.9	3364.97	1756.95	3388.95
	2311.91	10759	7073.96	3263.91	8474.97	8535.89	5076.96	16439.7	849.96	6154.98	5840.95	6343.95	6479.96		1830.95	4674.93	1661.83		12312.9	14627.9	19084	16214.9	5488.95	6755.6	9973.94	1310.96		6544.97	18628.9	19084	4953.96	9868.99	9647.98	577.898		11421.9	13816.9	3445.97	1970.95	3933.95
Figure 8G	Maxmum Vector (20-40 mins) response						Figure 8J	Maximum convergence (60mins)
	CTL	PLX	D3	D7-D8	D30			CTL	PLX	D3	D7-D8	D30
	2.1141	0	0.60512	0.93498	2.04052			749.407	1555.45	7486.91	1833.14	8004.4
	1.19074	0.70974	2.05574	1.82526	1.43218			4659.14	2453.77	11655.4	16175.4	10902.1
	1.93004	3.07092	1.10656	-1.77382	0.94156			4405.46	2457.33	9977.47	9977.47	501.132
	1.34892		2.50878	3.13448	2.43756			2207.07		15066.1	665.463	1965.28
	0.81334		2.54608	1.35822	3.18124			3862.97		1196.12	4611.16	728.114
	2.09092		2.05508	2.0825	1.77835			5867.89		5606.93	5355.98
	2.68338		3.19288	2.43756				4017.29		9496.44	722.898
	2.37878			2.74098				10444.9		252.131
	0.59562							792.627
	2.805							1875.31
	3.1134							2554.78
	5.28038							3216.28
								2616.96
Figure 8H	Area under the curve resonse						Figure 8K	Area under the curve convergence
	CTL	PLX	D3	D7-D8	D30			CTL	PLX	D3	D7-D8	D30
	13.99	0	6.711	9.766	14.01			16797	15398	87813	33974	87826
	8.142	5.545	15.99	13.32	9.021			67561	32243	118699	156717	111231
	11.72	20.24	10.79	17.47	6.642			50922	18706	125936	125936	12030
	9.482		17.33	21.29	17.22			25119		139658	19909	17658
	6.985		18.97	12.31	21.26			52348		25883	61910	18666
	15.51		16.6	15.96	6.306			65432		54108	57000
	18.68		22.08	17.22				42158		88003	6084
	14.45			18.07				116893		6423
	10.03							7195
	19.45							32742
	20.34							34649
	37.2							40902
								38615
